# Supplementary material
Source: PubMed Central journal article supplement (PMC3366509)
Supplement: NIHMS326774-supplement-1.pdf [file NIHMS326774-supplement-1.pdf]

**SUPPLEMENTARY INFORMATION**  
for Shen et al.,  
Nature Manuscript #2006-03-02695B

# Supplemental figure 1

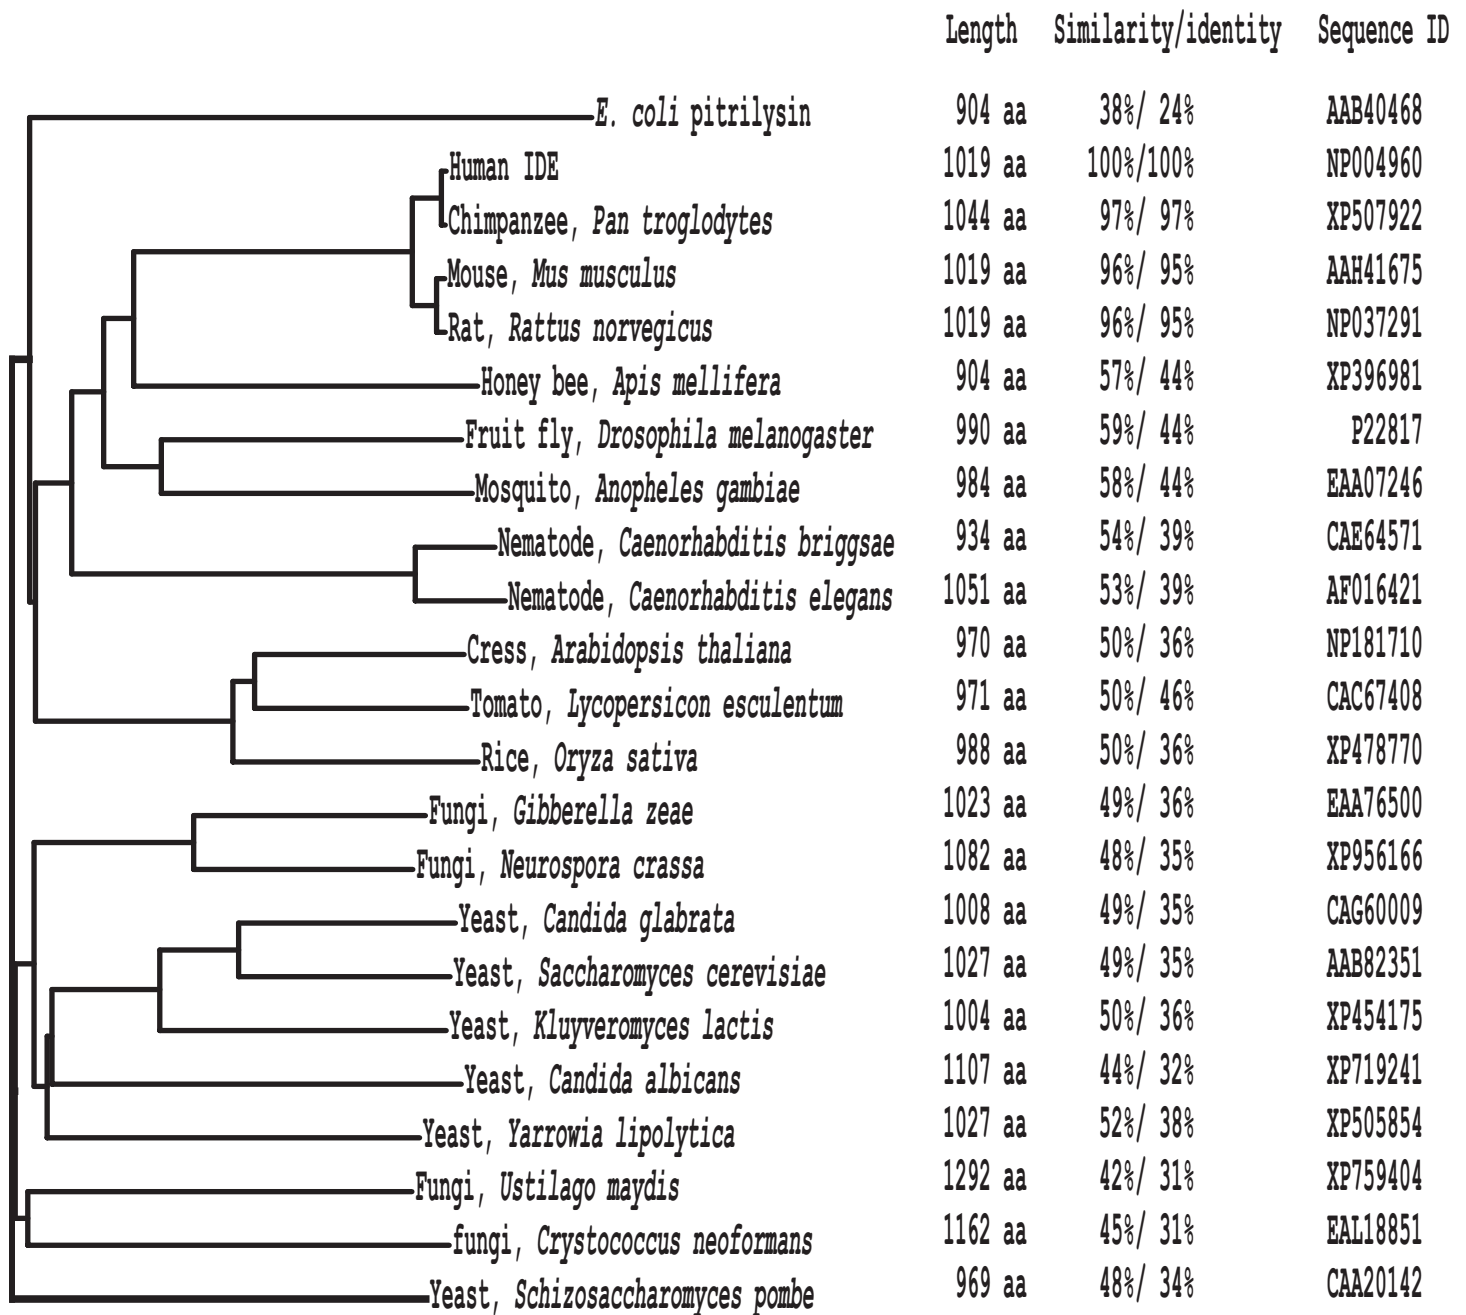

Phylogenetic tree of insulin degrading enzyme. The amino acid length and protein sequence ID of IDE homologues from mammals, insects, round worms, plants, and fungi are indicated. The sequence similarity and identity of IDE is compared to human IDE.

## Supplemental figure 2

|            |                                                                           | binding                        | degradation        |
|------------|---------------------------------------------------------------------------|--------------------------------|--------------------|
| ANP        | SLRRSSCFGGRIDRIGASGLGCNSFRY                                               | $IC_{50} \sim 10 \text{ nM}^1$ | rapid <sup>2</sup> |
| BNP        | DSGCFGRRLDRIGSLSGLCNVLRRY                                                 | $IC_{50} > 1 \text{ M}^1$      | slow <sup>2</sup>  |
| CNP        | GLSKGCFGLKLDRI SMSGLGC                                                    | n/a                            | slow <sup>2</sup>  |
| Glucagon   | HSQGTFTSDYSKYLDSRRAQDFVQWLMNT                                             | $IC_{50} = 5.3 \text{ M}^3$    | rapid <sup>3</sup> |
| GLP        | HADGTFTSDVSSYLKDQAIKDFVDRLKAGQVRRE                                        | none <sup>4</sup>              | n/a                |
| Insulin    | FVNQHLCGSHLVEALYLVCGERGFFYTPKT                                            | $K_m = 85 \text{ nM}^5$        | rapid <sup>5</sup> |
| IGF-II     | AYRPSETLCGGELVDTLQFVCGDRGFYFSRPA--SRVSRRSR--GIVEECCFRSCDLALLETYCAT--PAKSE | $IC_{50} = 50 \text{ nM}^6$    | rapid <sup>6</sup> |
| IGF-I      | GPETLCGAELVDALQFVCGDRGFYFNKPTGYGSSRRAPQTGIVDECCFRSCDLRRLEMYCAPLKPAKSA     | $IC_{50} > 150 \text{ nM}^6$   | slow <sup>6</sup>  |
| Proinsulin | FVNQHLCGSHLVEALYLVCGERGFFYTPKT<br>RREAEDLQVGQVELGGGPGAGSLQPLALEGSLQKR     | n/a                            | slow <sup>7</sup>  |

Sequence alignment of IDE interacting peptides. ANP, Atrial natriuretic peptide; BNP, Brain natriuretic peptide; CNP, C-type natriuretic peptide; GLP, glucagon-like peptide; IGF, insulin-like growth factor. Glucagon, GLP, insulin, IGF-I, IGF-II and proinsulin are from human. ANP is from rat, and BNP and CNP are from pig. The degradation of Insulin and proinsulin were measured using human IDE while ANP, BNP, CNP, glucagon, GLP, IGF-II and IGF-I were performed using rat IDE. Positively charged residues at the C-terminus of peptides that are not preferred by IDE are colored red. n/a means not available.

- 1 Muller, D., et al., Atrial natriuretic peptide (ANP) is a high-affinity substrate for rat insulin-degrading enzyme. *Eur. J. Biochem.*, 202:285-292, 1991.
- 2 Muller, D., et al., Rat Insulin-degrading enzyme: cleavage pattern of the natriuretic peptide hormones ANP, BNP and CNP revealed by HPLC and mass spectrometry. *Biochemistry*, 31:11138-11143, 1992.
- 3 Duckworth, W. C. & Kitabchi, A. E., Insulin and glucagon degradation by the same enzyme. *Diabetes*, 23:536-543, 1974.
- 4 Authier, F., et al., Degradation of the cleaved leader peptide of thiolase by a peroxisomal proteinase. *Proc. Nat. Acad. Sci. USA*, 92:3859-3863, 1995.
- 5 Chesneau V. & Rosner, M. R., Functional human insulin-degrading enzyme can be expressed in bacteria. *Protein Expr. Purif.*, 19:91-98, 2000.
- 6 Misbin, R. I., et al., Inhibition of insulin degradation by insulin-like growth factors. *Endocrinology*, 113:1525-1527, 1983.
- 7 Kitabchi, A. E., et al., Direct measurement of proinsulin in human plasma by the use of an insulin-degrading enzyme. *J. Clin. Invest.*, 50: 1792-1799, 1971.

# Supplemental figure 3

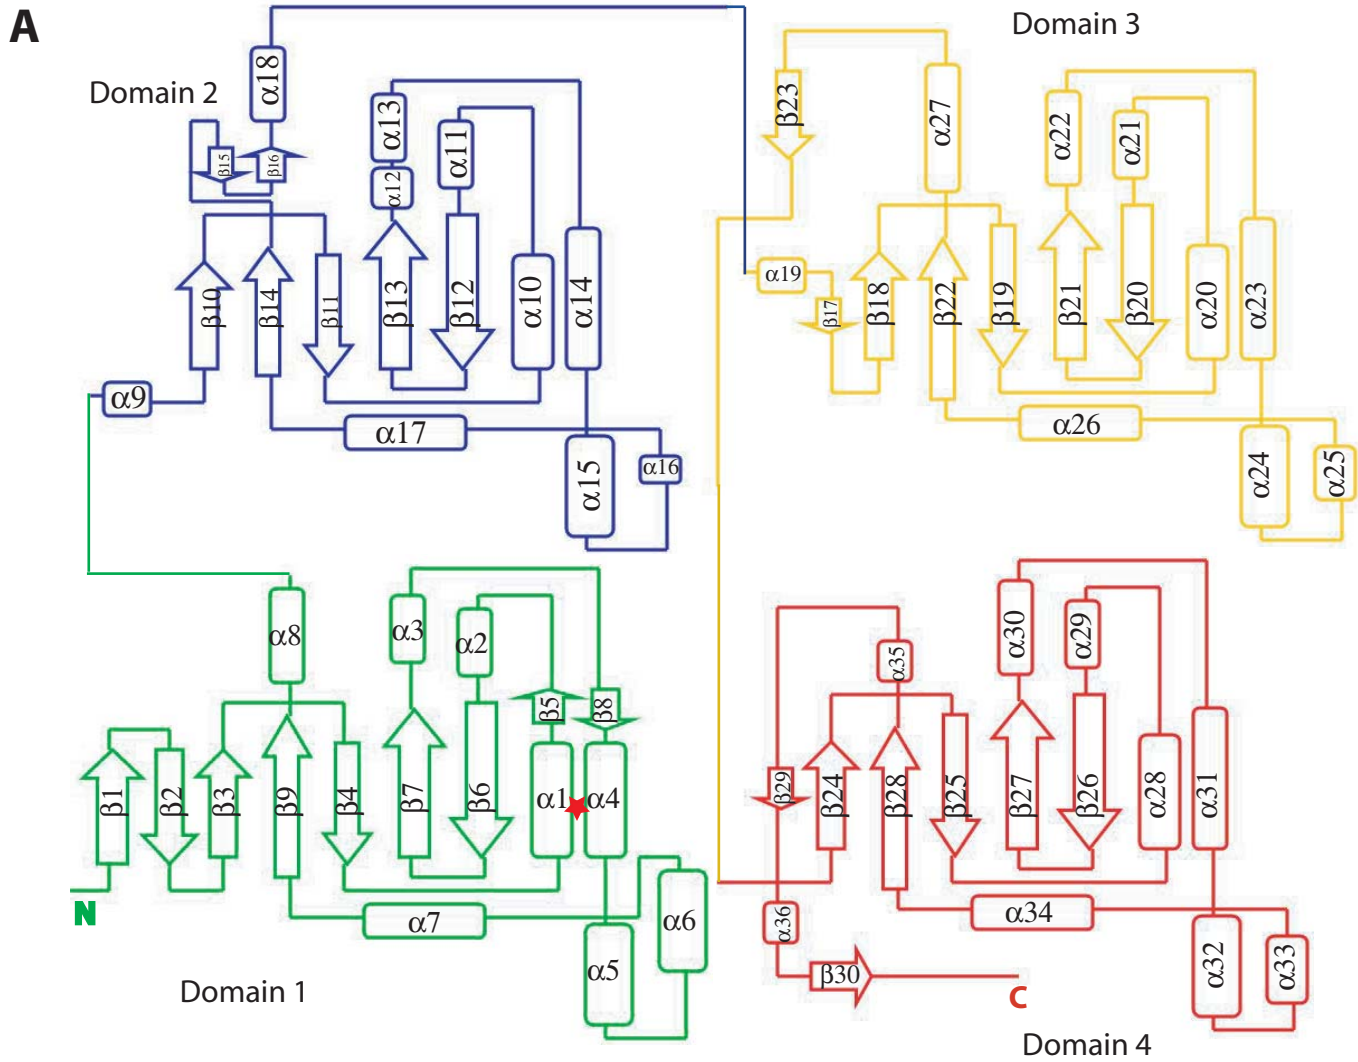

**B**

| Similarity(%)/<br>Identity(%) | Domain 1 | Domain 2 | Domain 3 |
|-------------------------------|----------|----------|----------|
| Domain 2                      | 21/11    |          |          |
| Domain 3                      | 21/12    | 24/12    |          |
| Domain 4                      | 20/7     | 24/15    | 15/7     |

Domain analysis of human insulin-degrading enzyme (IDE). **(A)** Secondary structure representation of IDE. The four IDE domains are colored green, blue, yellow and red. The location of the zinc metal binding, catalytic site of IDE is marked by a red star. **(B)** Pairwise sequence comparison of the four IDE domains.

# Supplemental figure 4A

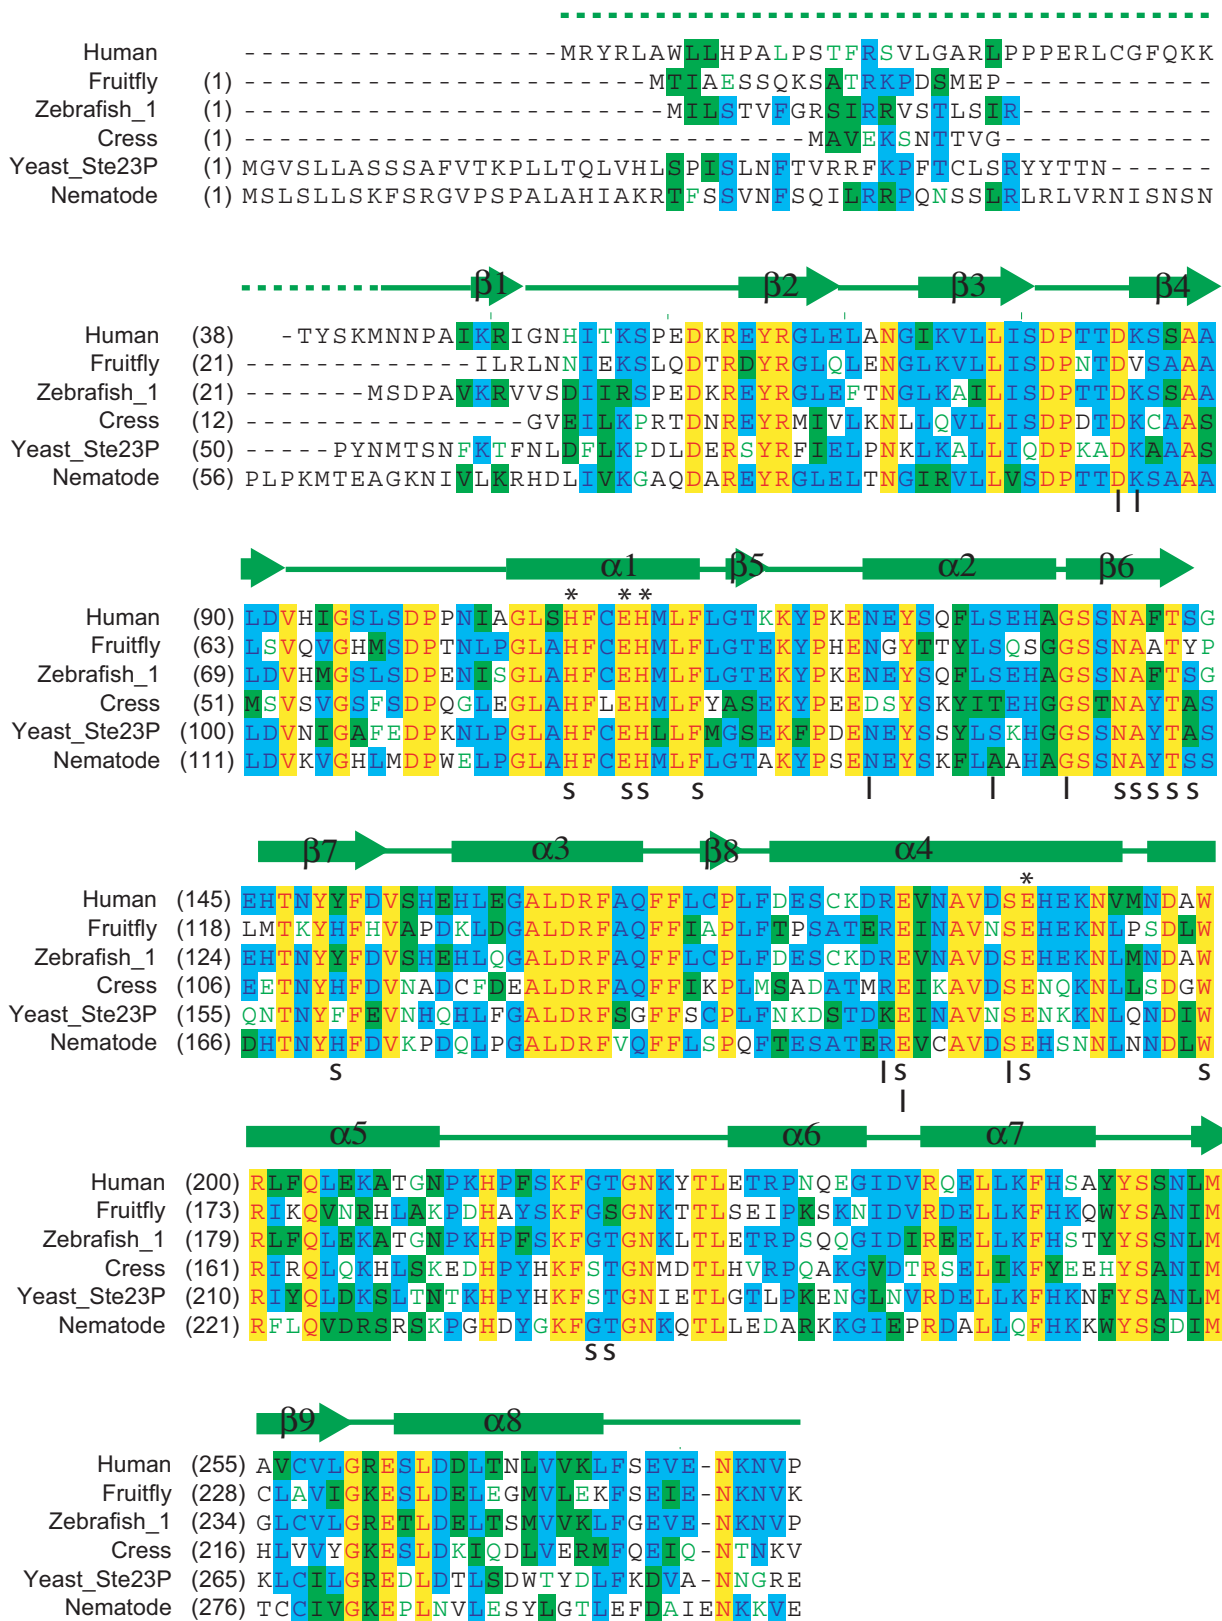

Sequence alignment of IDE domain 1 (A), domain 2 (B), domain 3 (C), and domain 4 (D). Residues below asterisks indicate the conserved residues for zinc binding and catalysis. Residues above "S" are those that are involved in substrate binding. Residues above "I" are those that are located at the interface between IDE-N and IDE-C and are involved in the interaction between these two domains (see the list in Supplemental figure 4E). Residues in red with yellow shade are residues that are identical within six members of IDE. Residues in blue are mostly identical among IDE family. Residue in green shade are homologous residues among IDE family. (E) List of atoms from IDE-N and IDE-C that are in close contact and the distance measurement.

# Supplemental figure 4B

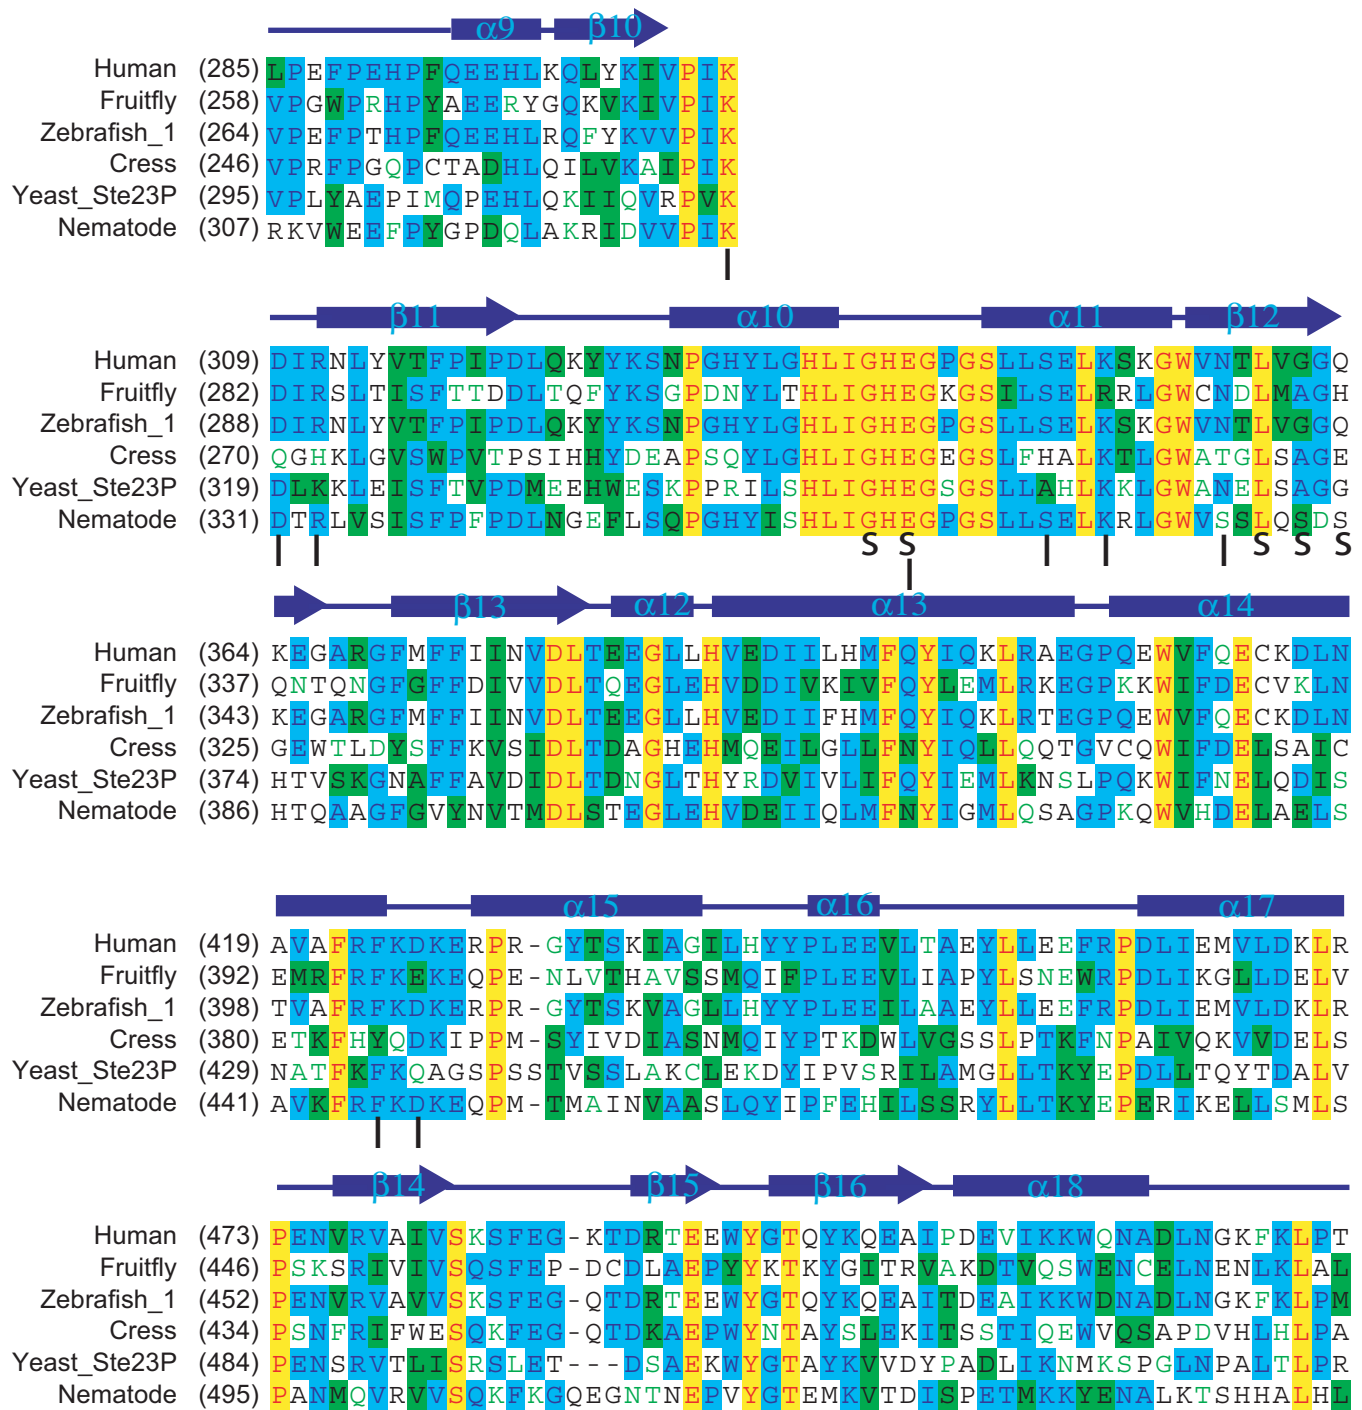

IDE domain 2 alignment. Residues above "S" are those that are involved in substrate binding. Residues above "I" are those that are located at the interface between IDE-N and IDE-C and are involved in the interaction between these two domains. Residues in red with yellow shade are residues that are identical within six members of IDE. Residues in blue are mostly identical residues and those in green shade are homologous residues.



# Supplemental figure 4C

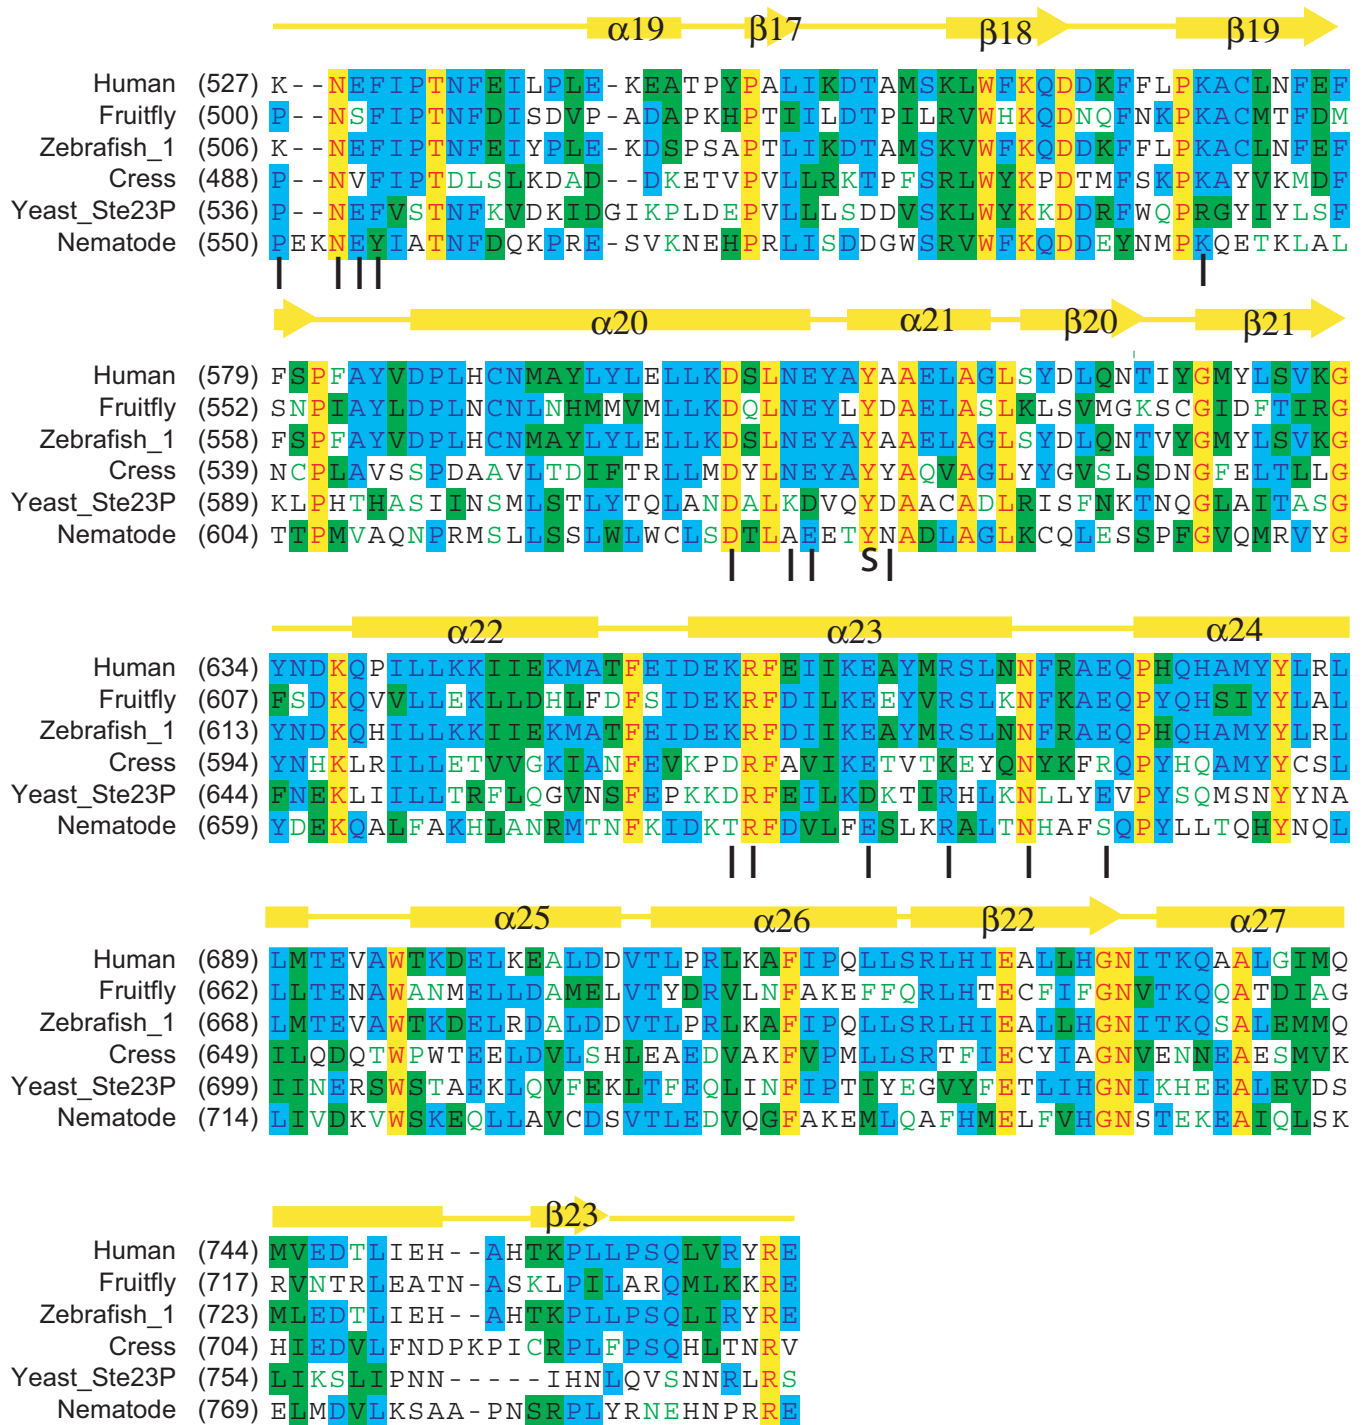

IDE domain 3 alignment. Residues above "S" are those that are involved in substrate binding. Residues above "I" are those that are located at the interface between IDE-N and IDE-C and are involved in the interaction between these two domains. Residues in red with yellow shade are residues that are identical within six members of IDE. Residues in blue are mostly identical residues and those in green shade are homologous

# Supplemental figure 4D

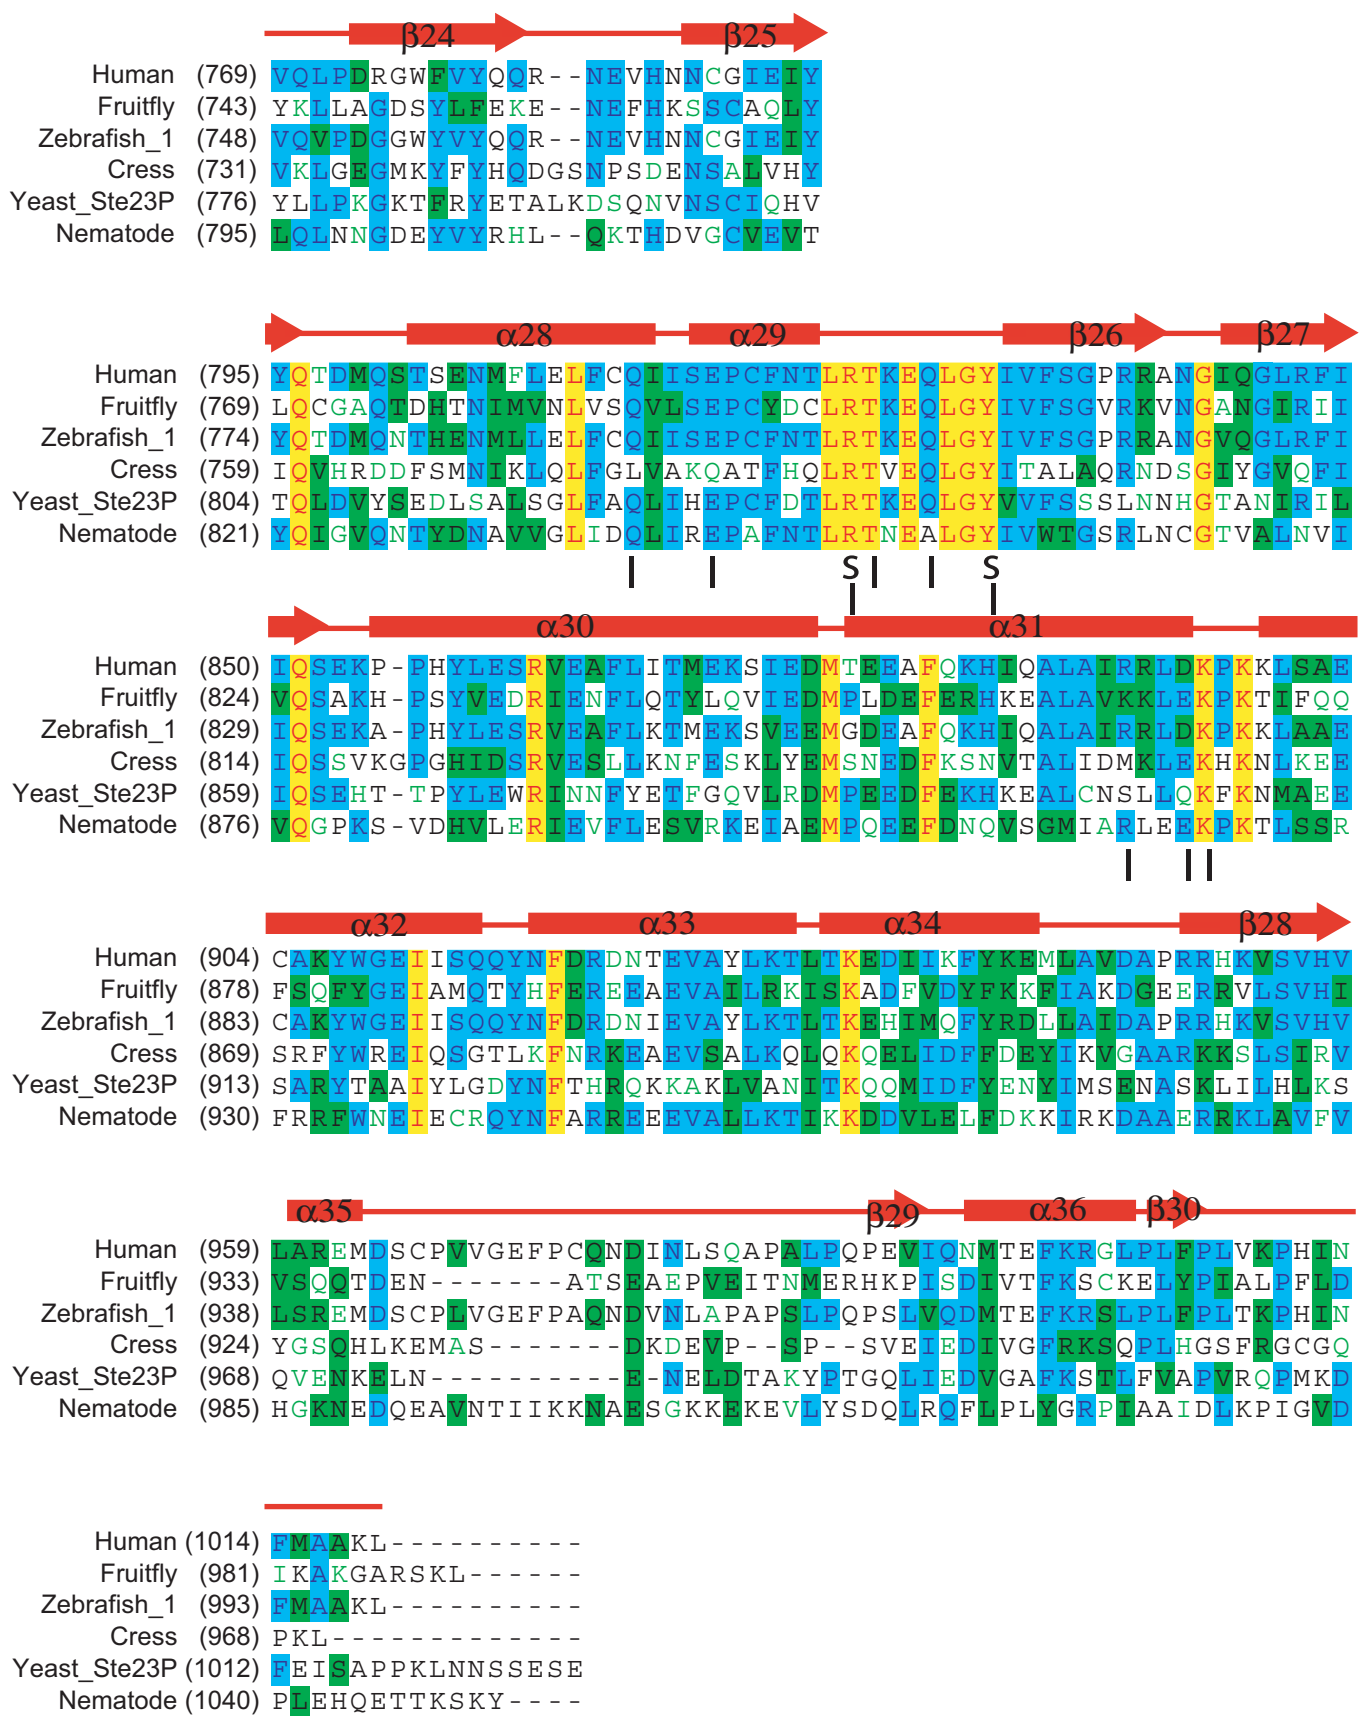

IDE domain 4 alignment. Residues above "S" are those that are involved in substrate binding. Residues above "I" are those that are located at the interface between IDE-N and IDE-C and are involved in the interaction between these two domains. Residues in red with yellow shade are residues that are identical within six members of IDE. Residues in blue are mostly identical residues and those in green shade are homologous residues.



# Supplemental figure 4E

| Atoms from IDE-N |     |     |       | Atoms from IDE-C |     |     |       | distance (Angstrom) |
|------------------|-----|-----|-------|------------------|-----|-----|-------|---------------------|
| [                | ASP | 84  | OD2 ] | [                | LYS | 896 | N ]   | 3.1                 |
| [                | LYS | 85  | NZ ]  | [                | ASP | 895 | OD2 ] | 3.3                 |
| [                | ASN | 125 | OD1 ] | [                | GLU | 817 | OE1 ] | 3.1                 |
| [                | SER | 132 | O ]   | [                | GLN | 813 | NE2 ] | 3.2                 |
| [                | SER | 132 | O ]   | [                | ARG | 892 | NH2 ] | 3.3                 |
| [                | GLY | 136 | O ]   | [                | ARG | 892 | NH1 ] | 2.6                 |
| [                | ARG | 181 | NH1 ] | [                | THR | 825 | O ]   | 2.8                 |
| [                | GLU | 182 | OE1 ] | [                | ARG | 824 | NH2 ] | 3.2                 |
| [                | GLU | 182 | OE2 ] | [                | GLN | 828 | OE1 ] | 3.3                 |
| [                | ALA | 185 | N ]   | [                | GLN | 828 | NE2 ] | 3.1                 |
| [                | SER | 188 | OG ]  | [                | TYR | 831 | N ]   | 2.7                 |
| [                | LYS | 308 | NZ ]  | [                | GLU | 676 | OE1 ] | 2.8                 |
| [                | ASP | 309 | O ]   | [                | ARG | 668 | NH1 ] | 2.8                 |
| [                | ASP | 309 | N ]   | [                | ASN | 672 | ND2 ] | 2.8                 |
| [                | ARG | 311 | NH2 ] | [                | GLU | 664 | OE2 ] | 2.5                 |
| [                | ARG | 311 | NH2 ] | [                | ARG | 668 | NE ]  | 3.1                 |
| [                | GLU | 341 | OE2 ] | [                | ASN | 605 | OD1 ] | 2.9                 |
| [                | SER | 348 | OG ]  | [                | GLU | 606 | OE2 ] | 2.7                 |
| [                | LYS | 351 | NZ ]  | [                | ASP | 602 | OD2 ] | 2.9                 |
| [                | LYS | 351 | O ]   | [                | LYS | 657 | NZ ]  | 2.9                 |
| [                | ASN | 357 | OD1 ] | [                | ARG | 658 | NH2 ] | 3.0                 |
| [                | PHE | 424 | O ]   | [                | LYS | 571 | NZ ]  | 2.8                 |
| [                | ASP | 426 | OD1 ] | [                | LYS | 571 | NZ ]  | 2.9                 |
| [                | LYS | 527 | O ]   | [                | GLU | 529 | N ]   | 3.1                 |
| [                | ASN | 528 | OD1 ] | [                | PHE | 530 | N ]   | 2.9                 |
| [                | ASN | 528 | ND2 ] | [                | ALA | 610 | O ]   | 2.9                 |

## Supplemental figure 5

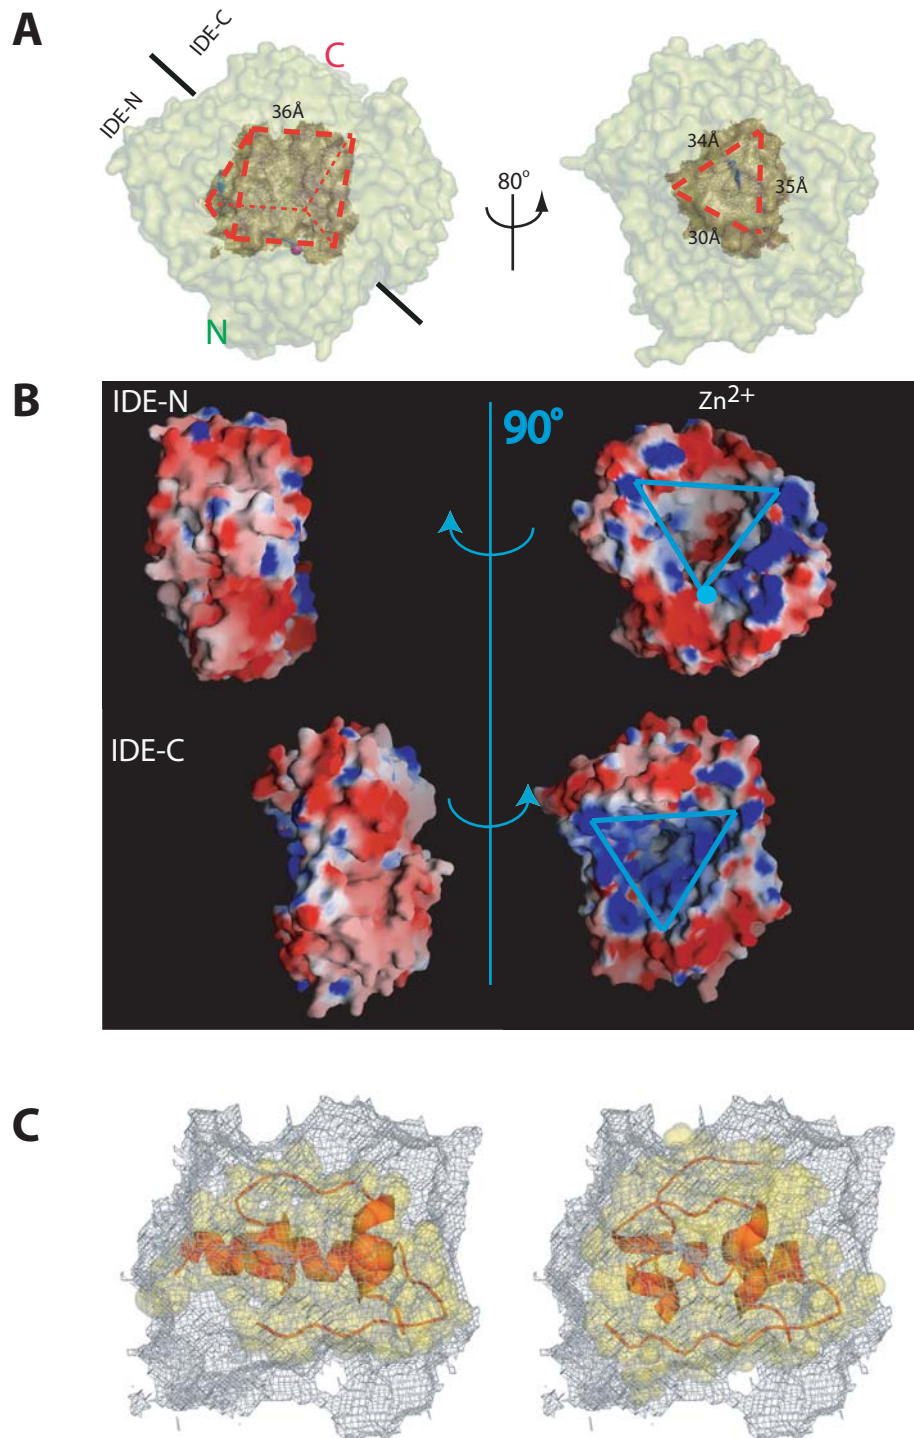

Analysis of the substrate binding chamber of IDE. **(A)** Surface representation of the IDE substrate binding chamber. Surface of IDE is shown in light yellow and the substrate binding chamber is colored brown. Zinc ion and insulin are colored magenta and orange, respectively. **(B)** Electrostatic surface representation of IDE-N and IDE-C. Triangles colored cyan indicate the shape of the substrate binding chamber. The GRASP program (Nicholls et al., *Proteins* 11:281, 1991) was used to calculate the surface potential. Negative surface is colored red, positive surface blue, and neutral surface white. **(C)** Models to depict how the enclosed substrate binding chamber is just large enough to accommodate intact insulin at its R state (left) or T-state (right). The substrate binding cavity is represented by the gray mesh. The space-filling and ribbon models of insulin (pdb code: 1G7A) are colored yellow and red, respectively.

# Supplemental figure 6

**A**

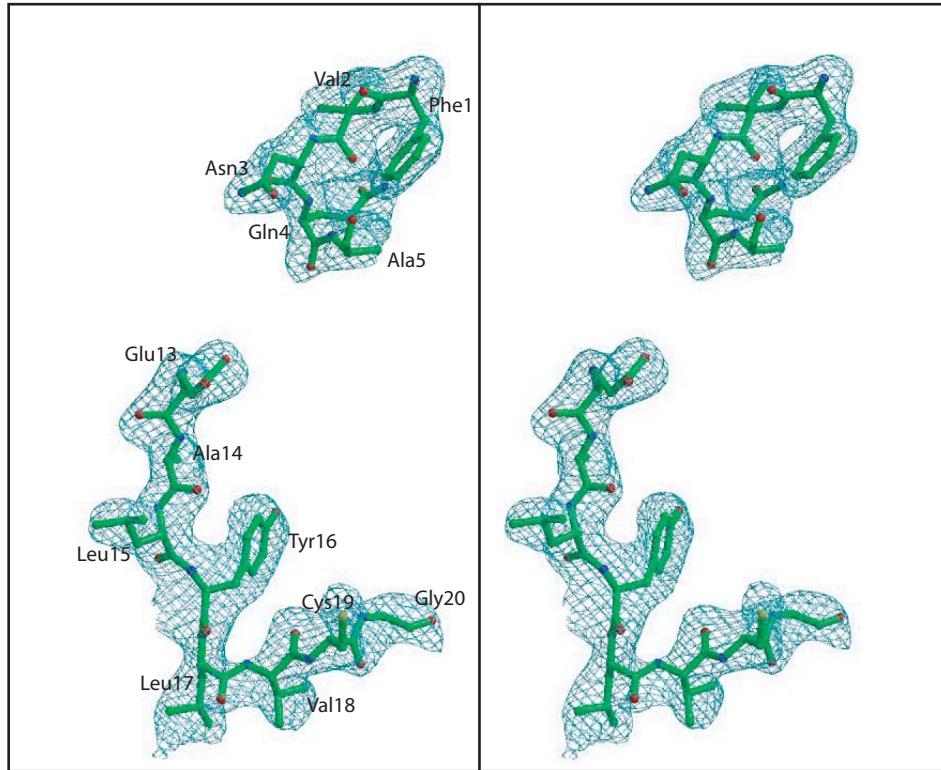

**B**

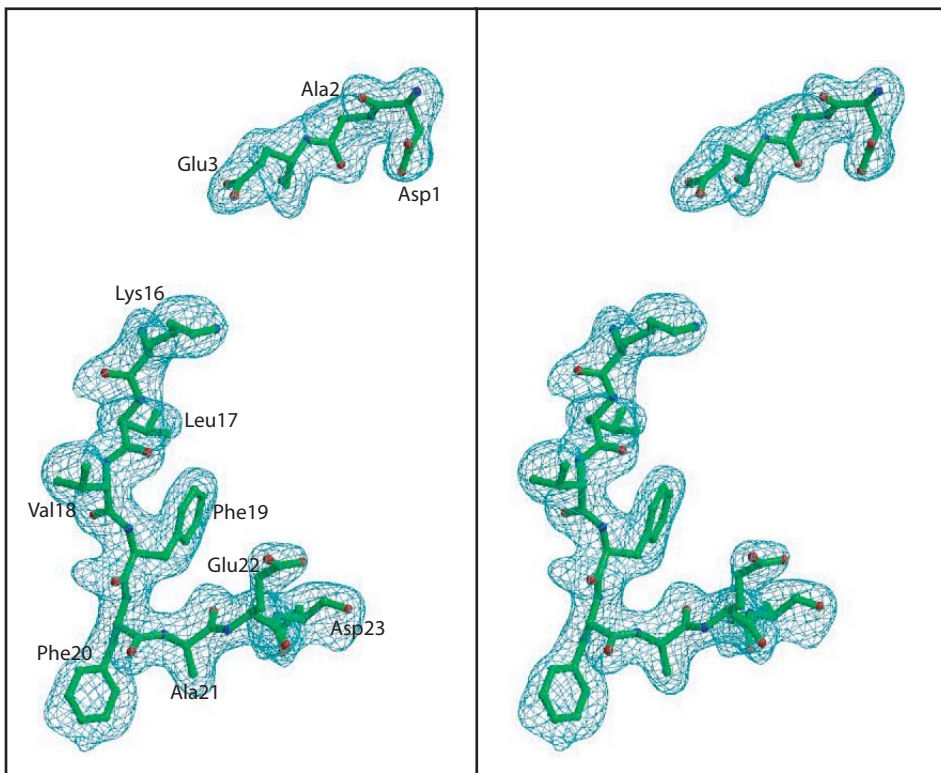

Stereo view of simulated annealing omit map contour at 3.5σ of IDE-bound insulin B chain (**A**) and IDE-bound Aβ (1-40) (**B**). The map is colored cyan and the backbone is colored green. Atoms oxygen, nitrogen and carbon are colored red, blue, and green, respectively.

# Supplemental figure 6 (continued)

**C**

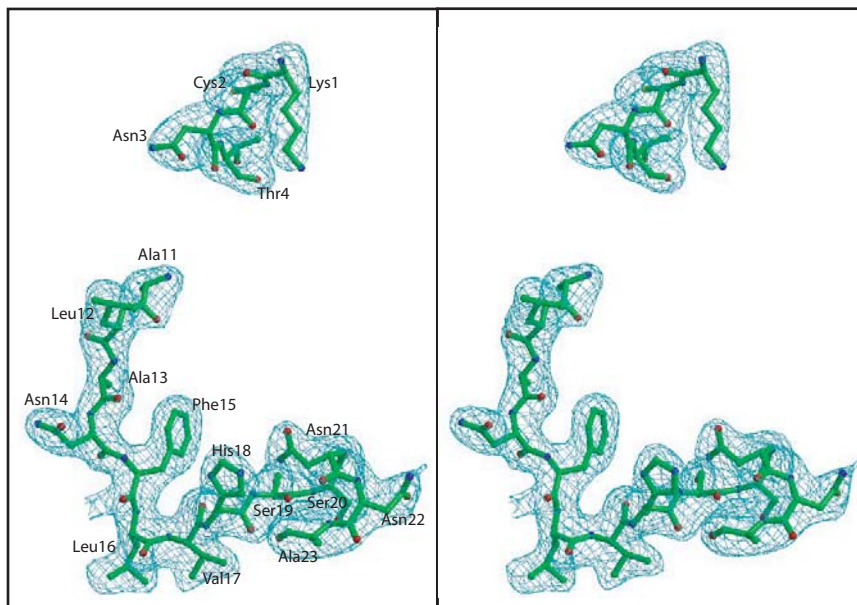

**D**

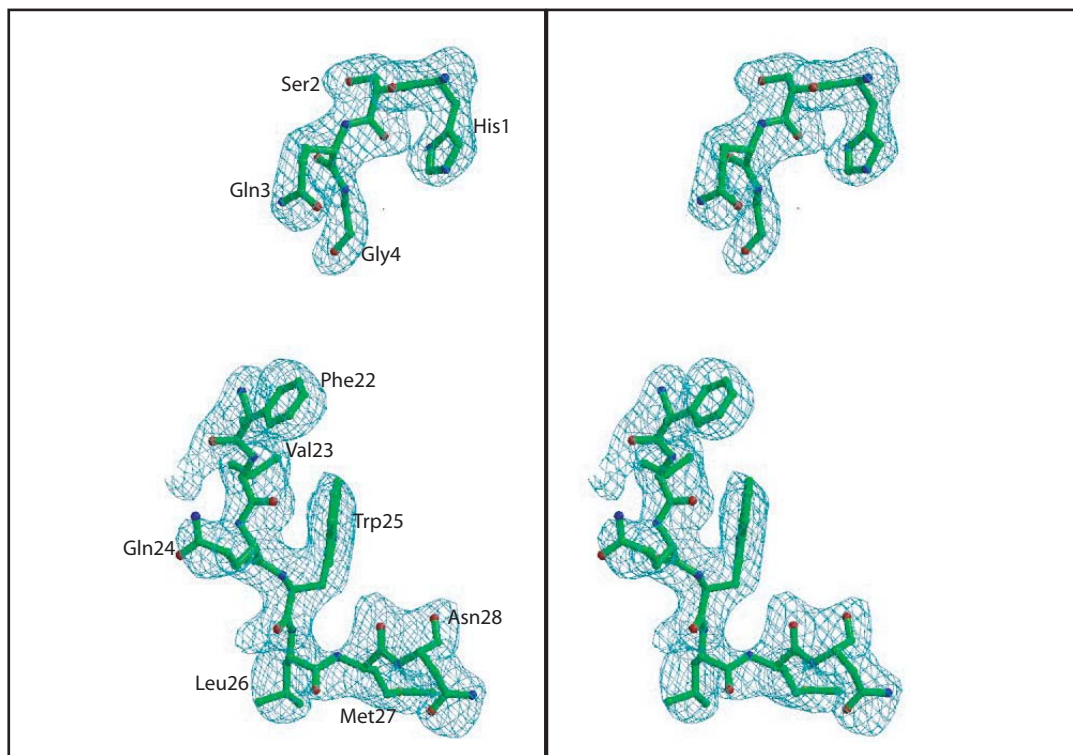

Stereo view of simulated annealing omit map contour at  $3.5\sigma$  of IDE-bound amylin (**C**) and IDE-bound glucagon (**D**). The map is colored cyan and the backbone is colored green. Atoms oxygen, nitrogen and carbon are colored red, blue, and green, respectively.



## Supplemental figure 6 (continued)

**E**

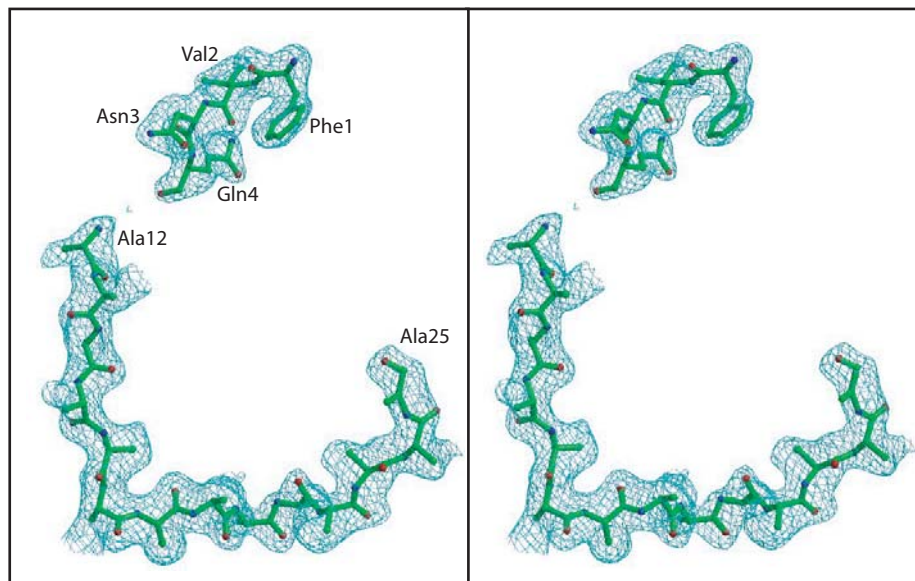

Stereo view of simulated annealing omit map contour at  $3.5\sigma$  of IDE-bound insulin in the presence of 5 mM EDTA (**E**). The map is colored cyan and the backbone is colored green. Atoms oxygen, nitrogen and carbon are colored red, blue, and green, respectively.

# Supplemental figure 7

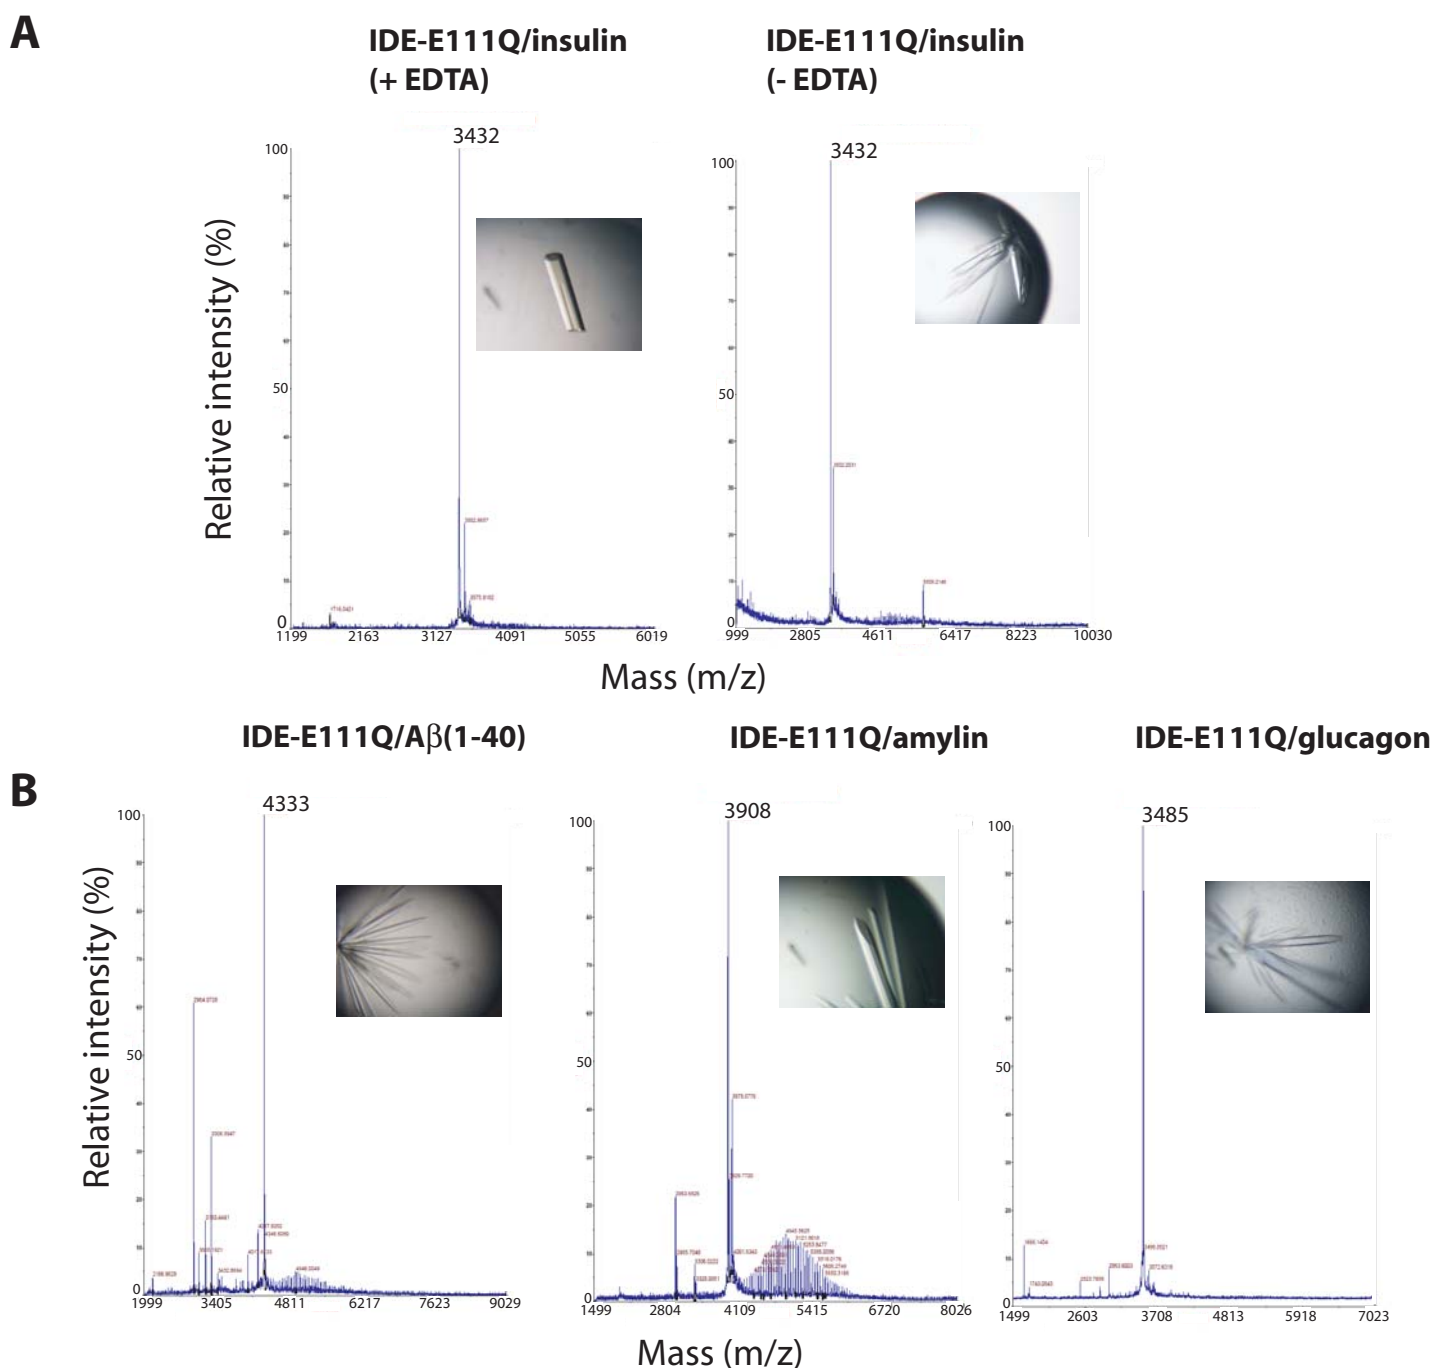

MALDI-TOF mass spectrometry analysis of crystals of IDE-substrate complexes. Mass-spec analysis of peptides eluted from IDE-insulin B chain crystals in the presence and absence of EDTA (**A**) and those from crystals of IDE in complex with A $\beta$ 1-40, amylin, and glucagon in the presence of EDTA (**B**). The expected molecular weight of these IDE substrates are as following: insulin B chain, 3431 dalton (Da); A $\beta$  1-40, 4331 Da, amylin, 3907 Da; and glucagon, 3484 Da. EDTA is used to chelate zinc ion to further reduce the catalysis of the IDE-E111Q mutant. All of the crystals are grown in the presence of 5 mM Tris(2-carboxyethyl) phosphine (TCEP, reducing agent). The disulfide bond of insulin is presumably reduced in the crystal of IDE-E111Q in complex with insulin. For MALDI-ToF experiments, 5  $\mu$ l of samples were mixed with equal volume of 0.1% trifluoroacetic acid (TFA) and passed through a C-18 ZipTip (Millipore). 1  $\mu$ l treated samples were then mixed with matrix ( $\alpha$ -cyano-4-hydroxycinn) and spotted on the metal plate (ABI). The experiment was done using ABI 4700 Maldi TOF/TOF MS.



# Supplemental figure 8

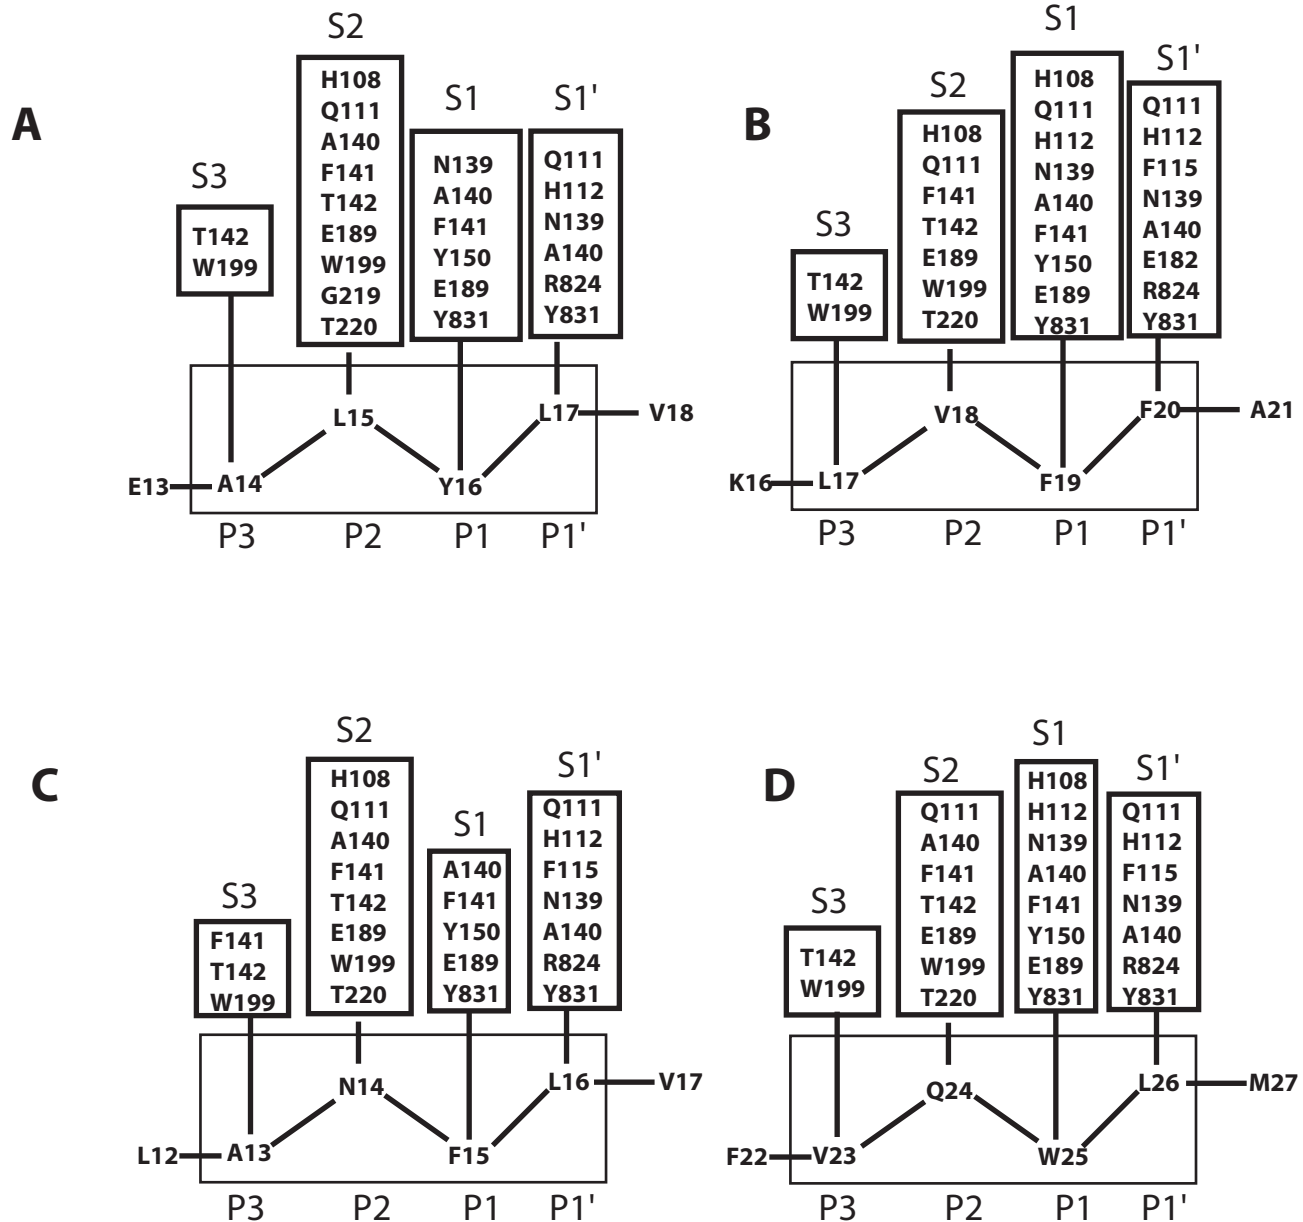

Detailed interactions of residues at the IDE catalytic cleft with the cleavage sites of insulin B chain (**A**), A $\beta$ 1-40 (**B**), amylin (**C**), and glucagon (**D**). The cut-off distance is 4.0Å.

# Supplemental figure 9

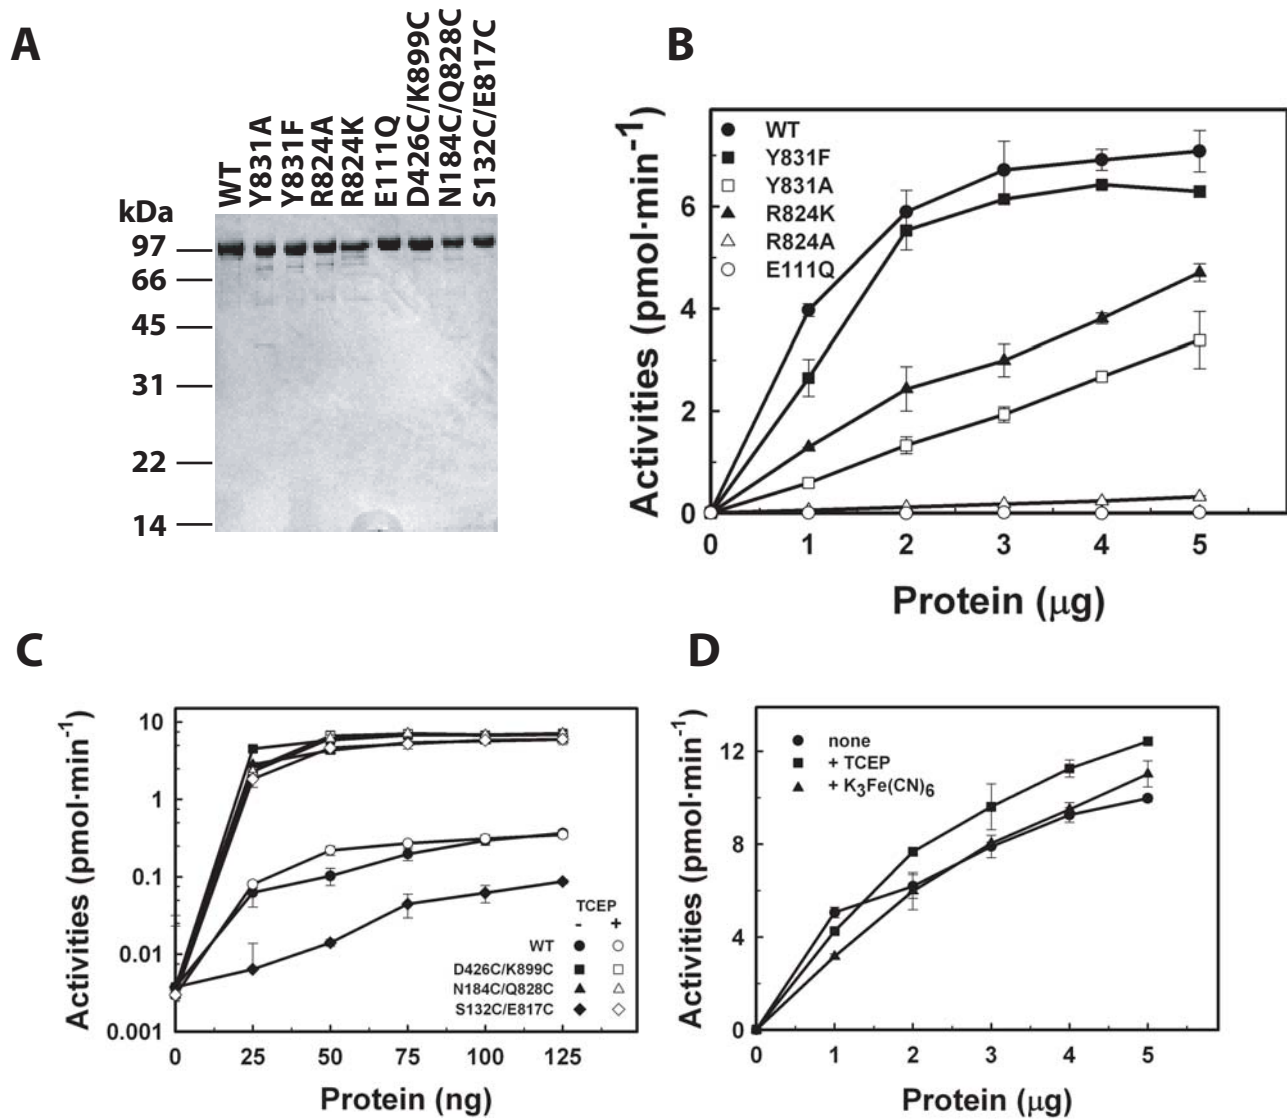

Enzymatic activities of IDE mutants.

- (A) Coomassie blue staining of purified IDE proteins. 1.5  $\mu\text{g}$  protein was loaded on 13% SDS-PAGE gel.
- (B) Activities of IDE mutants which had a single mutation in domain 4 or the catalytic base in domain 1. The indicated quantities of IDE proteins were used and the fluorescence intensity was measured after the reaction was performed for one hour.
- (C) Activities of IDE double cysteine mutants in the absence (filled symbols) and presence (open symbols) of TCEP. The assays were done after one hour incubation using indicated quantities of IDE.
- (D) Comparison of IDE wild type activities in the presence and absence of 1mM reducing agent, TCEP or 1 mM oxidizing agent,  $\text{K}_3\text{Fe}(\text{CN})_6$ . The reaction was performed for 30 minutes under identical conditions as described in figure 3D and 3E.

## Supplemental figure 10

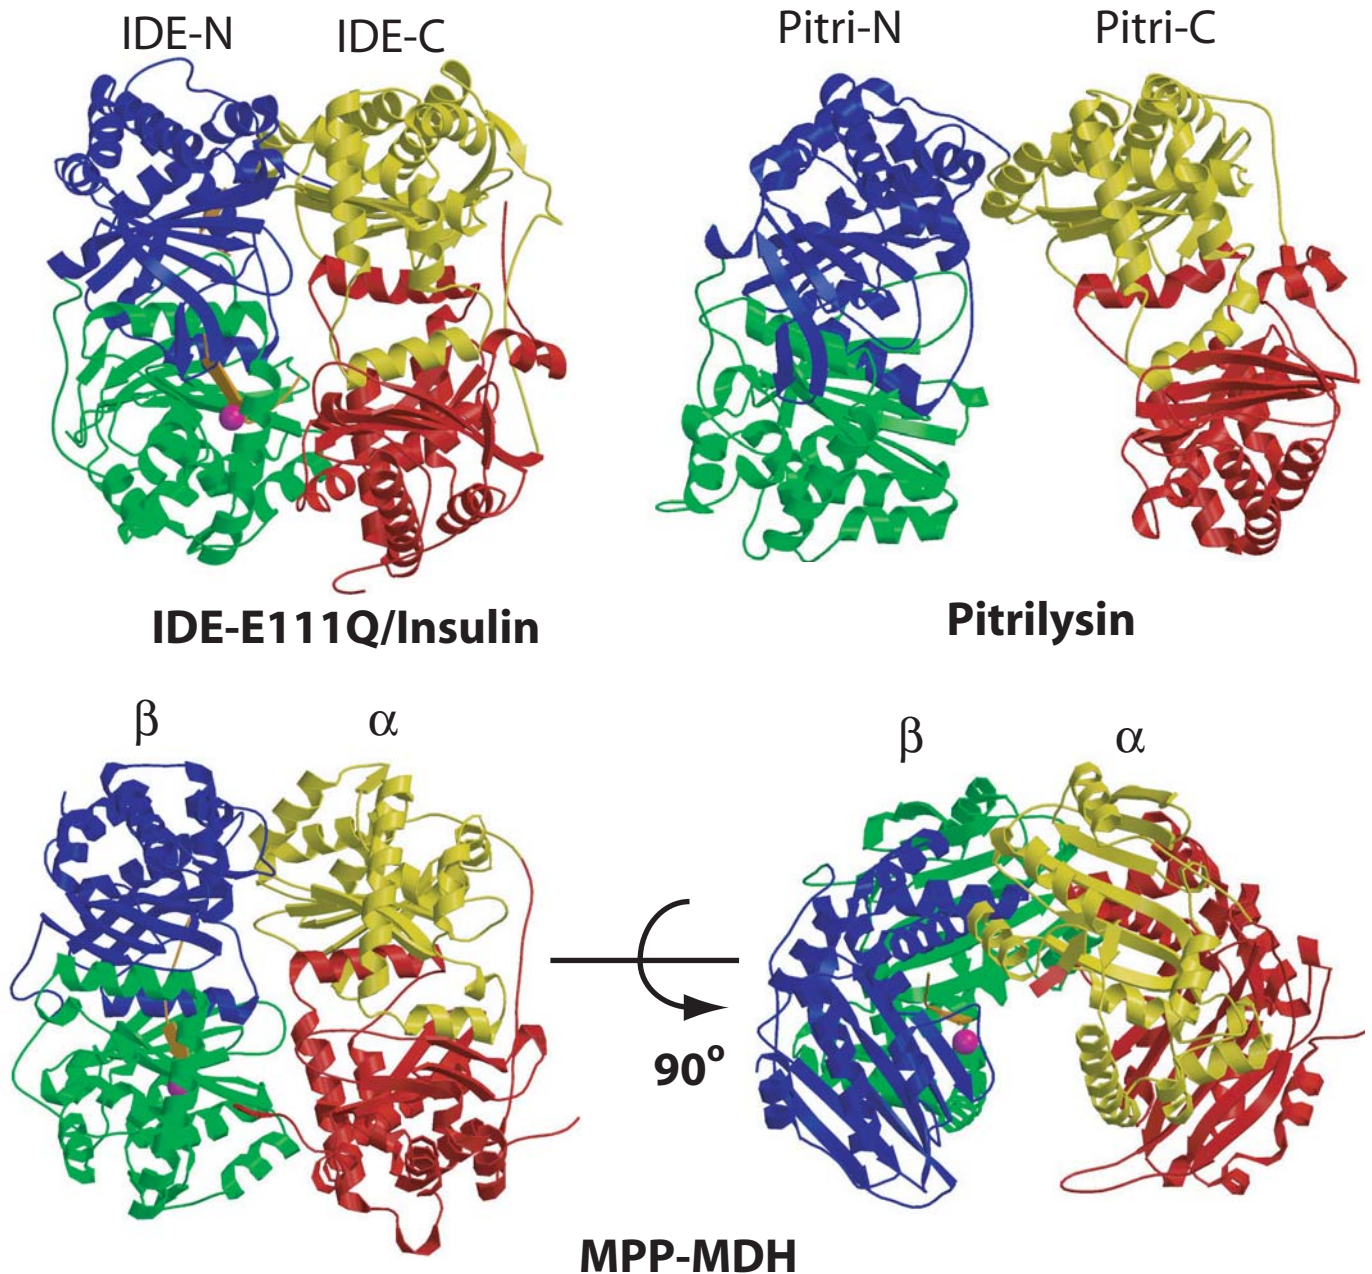

Structural comparison of insulin B chain-bound IDE with substrate-free *E. coli* pitriysin (pdb code: 1Q2L) and Yeast mitochondria processing peptidase (MPP, pdb code:1HR9). Four structurally homologous domains are colored green, blue, yellow, and red, respectively. Insulin and Zn ion are colored orange and magenta. Domains of MPP  $\beta$  and  $\alpha$  subunit are colored based on the corresponding domains of IDE. Peptide substrate from the N-terminal signal peptide of Malate dehydrogenase (MDH) and zinc ion are colored orange and magenta, respectively. It is worth noting that the opening of MPP is completely different from pitriysin.

## Supplemental figure 11

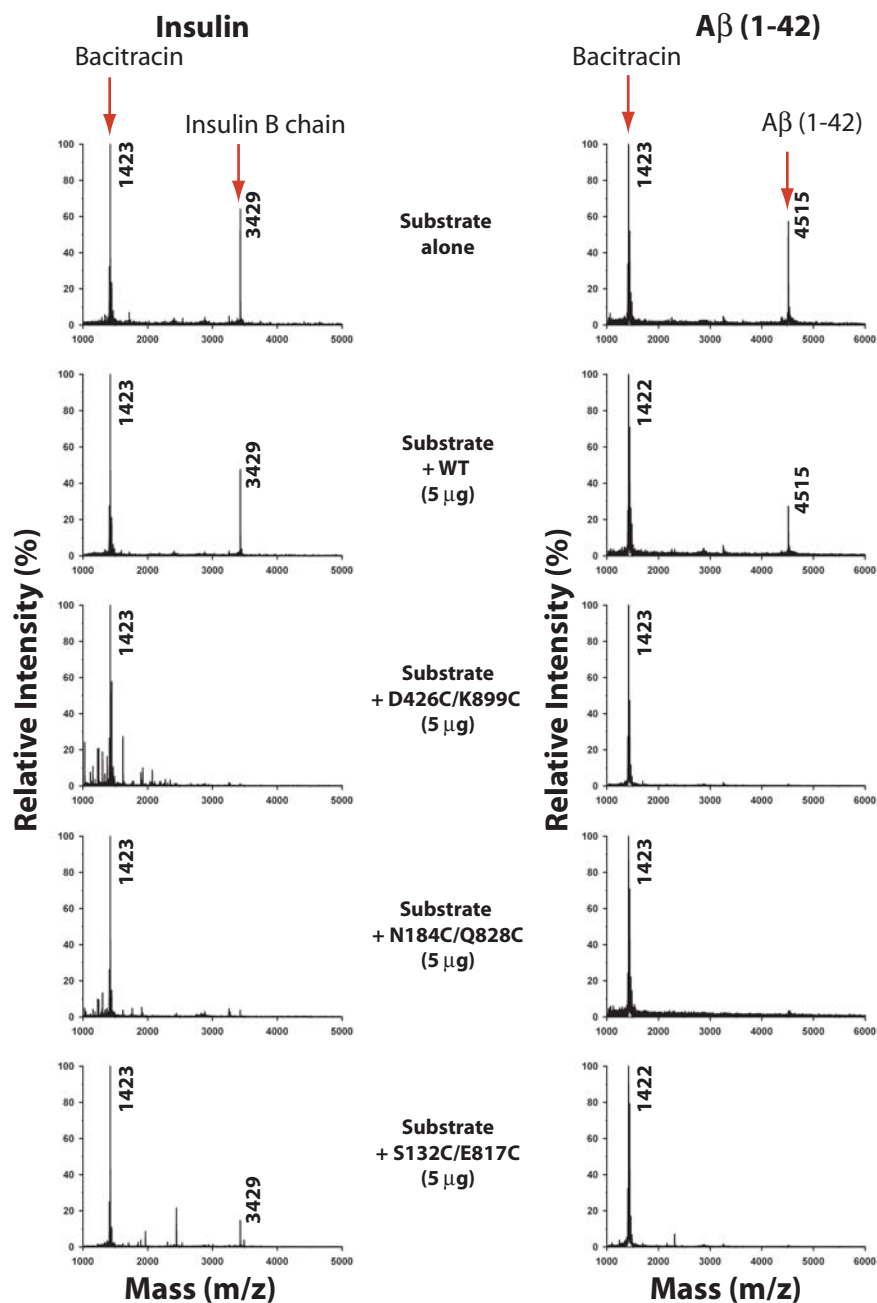

MALDI-ToF mass spectrometry analysis of the degradation of insulin and Aβ (1-42) by IDE mutants. To perform the reactions, 10 μl buffer (20 mM HEPES, pH7.2, 1mM TCEP) was incubated with 5 μg IDE protein (5μl of 1 mg/ml protein solution) at room temperature for 5 minutes. The reaction was started by adding 5 μg insulin or 15 μg Aβ (1-42) into the above mixture and then incubated for one hour at 37 °C. The reaction was stopped by the addition of 5 μl TFA(10%). The 5 μg bacitracin was then added to serve as a recovery standard of mass spectrometry. The reaction solution (0.5 μl) was mixed with 0.5 μl matrix ( $\alpha$ -cyano-4-hydroxycinn) and directly spotted on the metal plate as described in supplemental figure 7. The estimated molecular weight of bacitracin, insulin B chain and Aβ (1-42) are 1,423 daltons, 3,431 daltons and 4,514 daltons, respectively. Data presented are representative of two independent experiments. This experiment demonstrates that, under identical reaction condition all three double cysteine IDE mutants could degrade both insulin and Aβ(1-42) more effectively than wild type IDE. This suggests that all three IDE mutants under reduced condition (+ TCEP) are substantially more active than wild type IDE. This result is consistent with our finding using fluorogenic substrate V.

## Supplemental figure 12

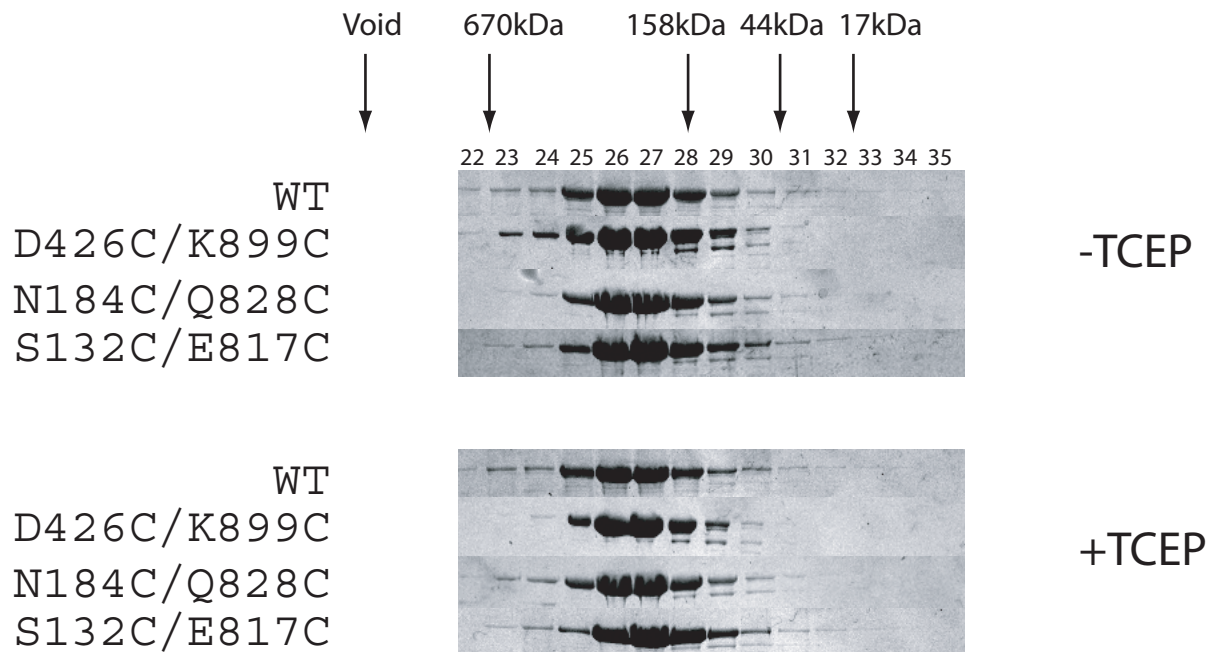

Oligomeric state of wild type IDE and its mutants. Each protein (5 mg) was mixed with 0.6 ml buffer (20 mM Tris pH 8.0, 100 mM NaCl with/without 1 mM TCEP) on ice for 30 minutes and then loaded onto the superose 6 size-exclusion column (GE healthcare). The elution was run by AKTA FPLC (GE healthcare) with a flow rate of 0.3 ml/min and fractions were collected every two minutes. The peak fractions are then run on 13% SDS-PAGE gel and the gel was stained by Coomassie staining. The gel-filtration standard (Biorad) was run under identical conditions. The molecular weight standard and fraction number are indicated above. Compared with wild type IDE, we did not observe an obvious change in the elution profile of all three double cysteine IDE mutants. This indicates that no clear change occurs upon oligomerization of these three IDE mutants. Thus, the change of oligomerization state is unlikely to be the cause of the elevated proteolytic activity of these three IDE mutants.



# Supplemental figure 13

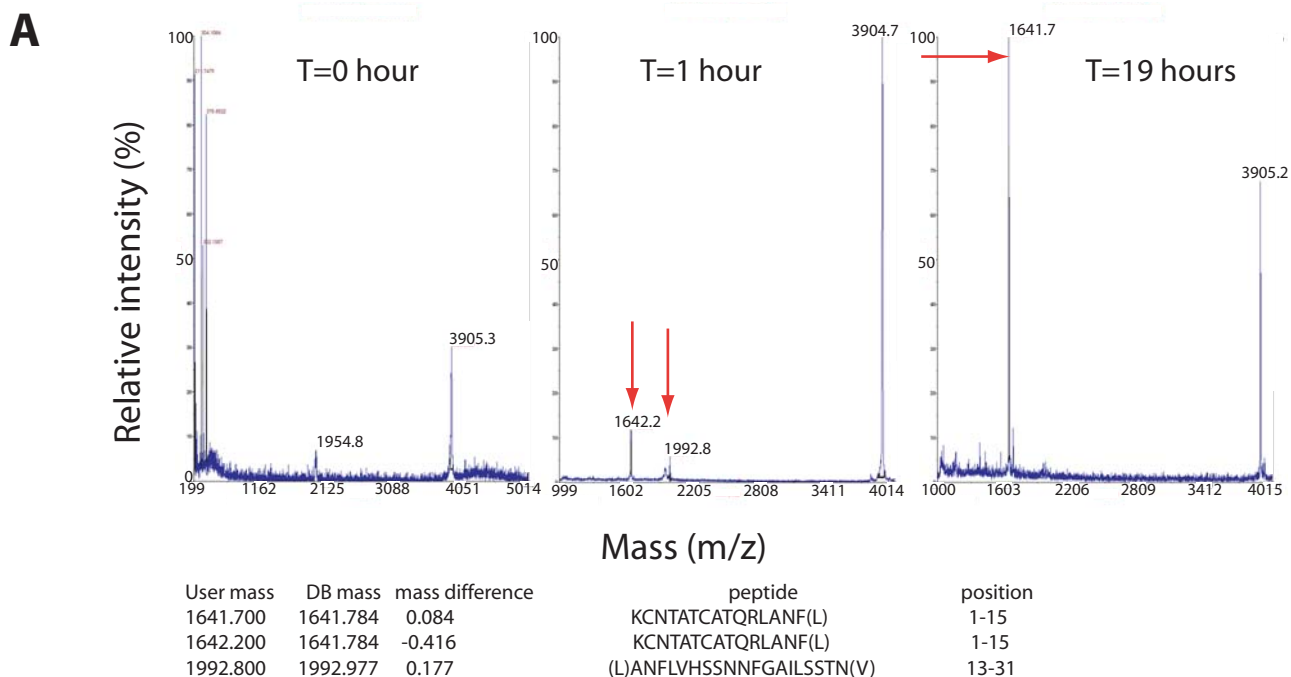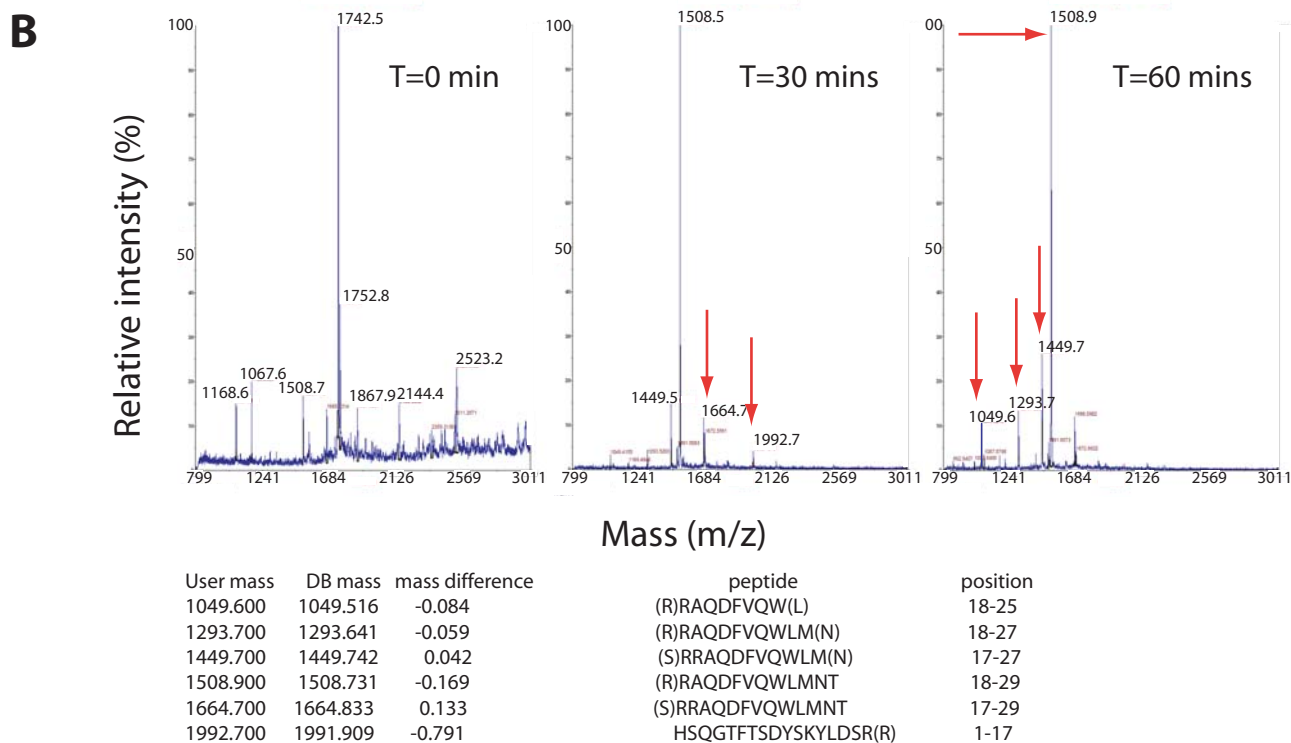

Identification of major cleavage sites of Amylin (**A**) and Glucagon (**B**). The degradation experiment was performed in the presence of 100 mM HEPES (pH 7.2), 2 mM MnCl<sub>2</sub>, 2.5 M IDE and 82 M amylin or 92 M glucagon at 37°C. The reaction was stopped by mixing 10 l reaction mixture with 10 l 500 mM EDTA and 20 l 0.1% TFA. The solution was then subjected to MALDI-TOF analysis as described in supplemental figure 6. The peaks indicated by red arrows were analyzed. The cleavage sites of glucagon by IDE is consistent with partially mapped sites (Baskin, F. K., et al., Sites of cleavage of glucagon by insulin-glucagon protease, *Biochem. Biophys. Res. Commun.*, 67:163-169, 1975; Rose, K., et al., Insulin proteinase liberates from glucagon a fragment known to have enhanced activity against Ca<sup>2+</sup> + Mg<sup>2+</sup> -dependent ATPase, *Biochem. J.*, 256:847-851, 1988.)



## Supplemental figure 14

**A**

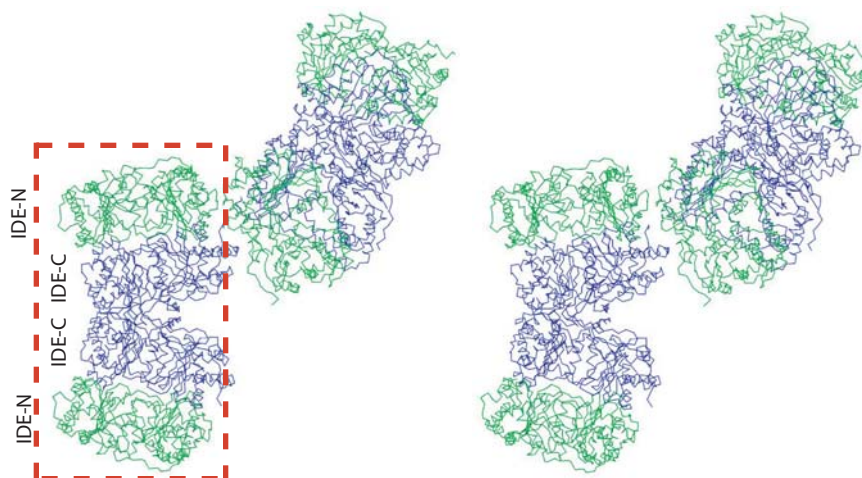

**B**

| Atoms from 1st IDE molecule |           | Atoms from 2nd IDE molecule |     | Distance (Angstrom) |      |
|-----------------------------|-----------|-----------------------------|-----|---------------------|------|
| Glu                         | 692A OE2  | ...                         | Glu | 692B OE2            | 2.90 |
| Asp                         | 706A OD2  | ...                         | Arg | 722B NH1            | 2.51 |
| Asp                         | 706A OD2  | ...                         | Arg | 722B NH2            | 2.63 |
| Arg                         | 711A NE   | ...                         | Gln | 718B OE1            | 3.14 |
| Arg                         | 722A NH1  | ...                         | Asp | 706B OD2            | 3.00 |
| Lys                         | 756A NZ   | ...                         | Asp | 706B OD2            | 2.86 |
| Arg                         | 767A NH1  | ...                         | Leu | 1002B O             | 2.79 |
| Arg                         | 767A NH2  | ...                         | Lys | 999B O              | 2.83 |
| Lys                         | 999A O    | ...                         | Arg | 767B NH2            | 3.02 |
| Arg                         | 1000A NH2 | ...                         | Val | 1008B O             | 3.10 |
| Arg                         | 1000A O   | ...                         | Leu | 1007B N             | 2.83 |
| Leu                         | 1002A O   | ...                         | Arg | 767B NH1            | 2.84 |
| Leu                         | 1004A N   | ...                         | Leu | 1004B O             | 2.94 |
| Leu                         | 1004A O   | ...                         | Leu | 1004B N             | 2.92 |
| Leu                         | 1007A N   | ...                         | Arg | 1000B O             | 2.82 |

**C**

| Atoms from 1st IDE dimer |          | Atoms from 2nd IDE dimer |     | Distance (Angstrom) |      |
|--------------------------|----------|--------------------------|-----|---------------------|------|
| Tyr                      | 121B OH  | ...                      | Trp | 409C N              | 3.29 |
| Lys                      | 123B NZ  | ...                      | Asp | 416C OD1            | 3.07 |
| Arg                      | 164B NH1 | ...                      | Glu | 408C OE1            | 3.03 |
| Arg                      | 164B NH2 | ...                      | Gln | 412C NE2            | 3.18 |
| Thr                      | 878B OG1 | ...                      | Glu | 457C OE1            | 2.53 |
| Glu                      | 880B OE1 | ...                      | Glu | 458C OE1            | 2.79 |
| Glu                      | 880B OE2 | ...                      | Lys | 327C NZ             | 2.67 |
| Lys                      | 933B NZ  | ...                      | Thr | 55C OG1             | 3.20 |

Oligomerization of IDE molecules. **(A)** Stereo view of the IDE dimer and the crystal packing of IDE dimers. IDE-N and IDE-C are colored green and blue, respectively. Two IDE-E111Q molecules form a dimer through the interaction of IDE-C (dashed red box) in one asymmetric unit. **(B)** List of close contacts between two IDE molecules in an IDE dimer, which are largely mediated through domain 3 and the C-terminus of IDE. **(C)** List of close contacts between two IDE dimers depicted by crystal packing of an IDE dimer. This interaction could lock IDE in the closed conformation, which would prevent substrate entry and product release. This could explain why an IDE tetramer is less active than an IDE monomer or dimer (Song et al J. Biol. Chem 278:49789, 2003).

## Supplemental figure 15

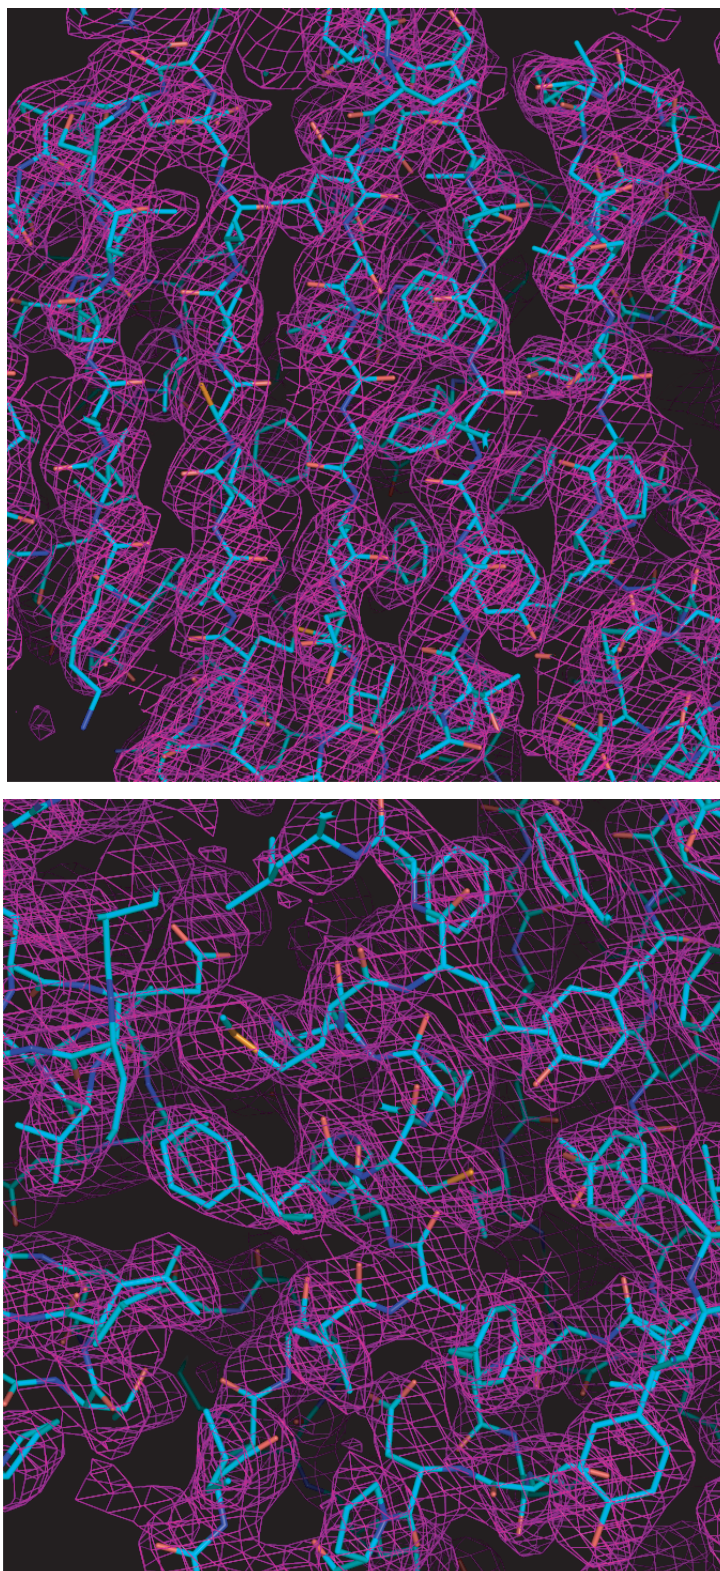

The electron density map representing  $\beta$ -sheet (**top**) and  $\alpha$ -helix (**bottom**) regions of IDE from SAD phases is contoured at  $1.0 \sigma$  level. The backbone is colored cyan and atoms oxygen, nitrogen, carbon and sulfur are colored red, blue, cyan, and orange, respectively.

## Supplemental figure 16

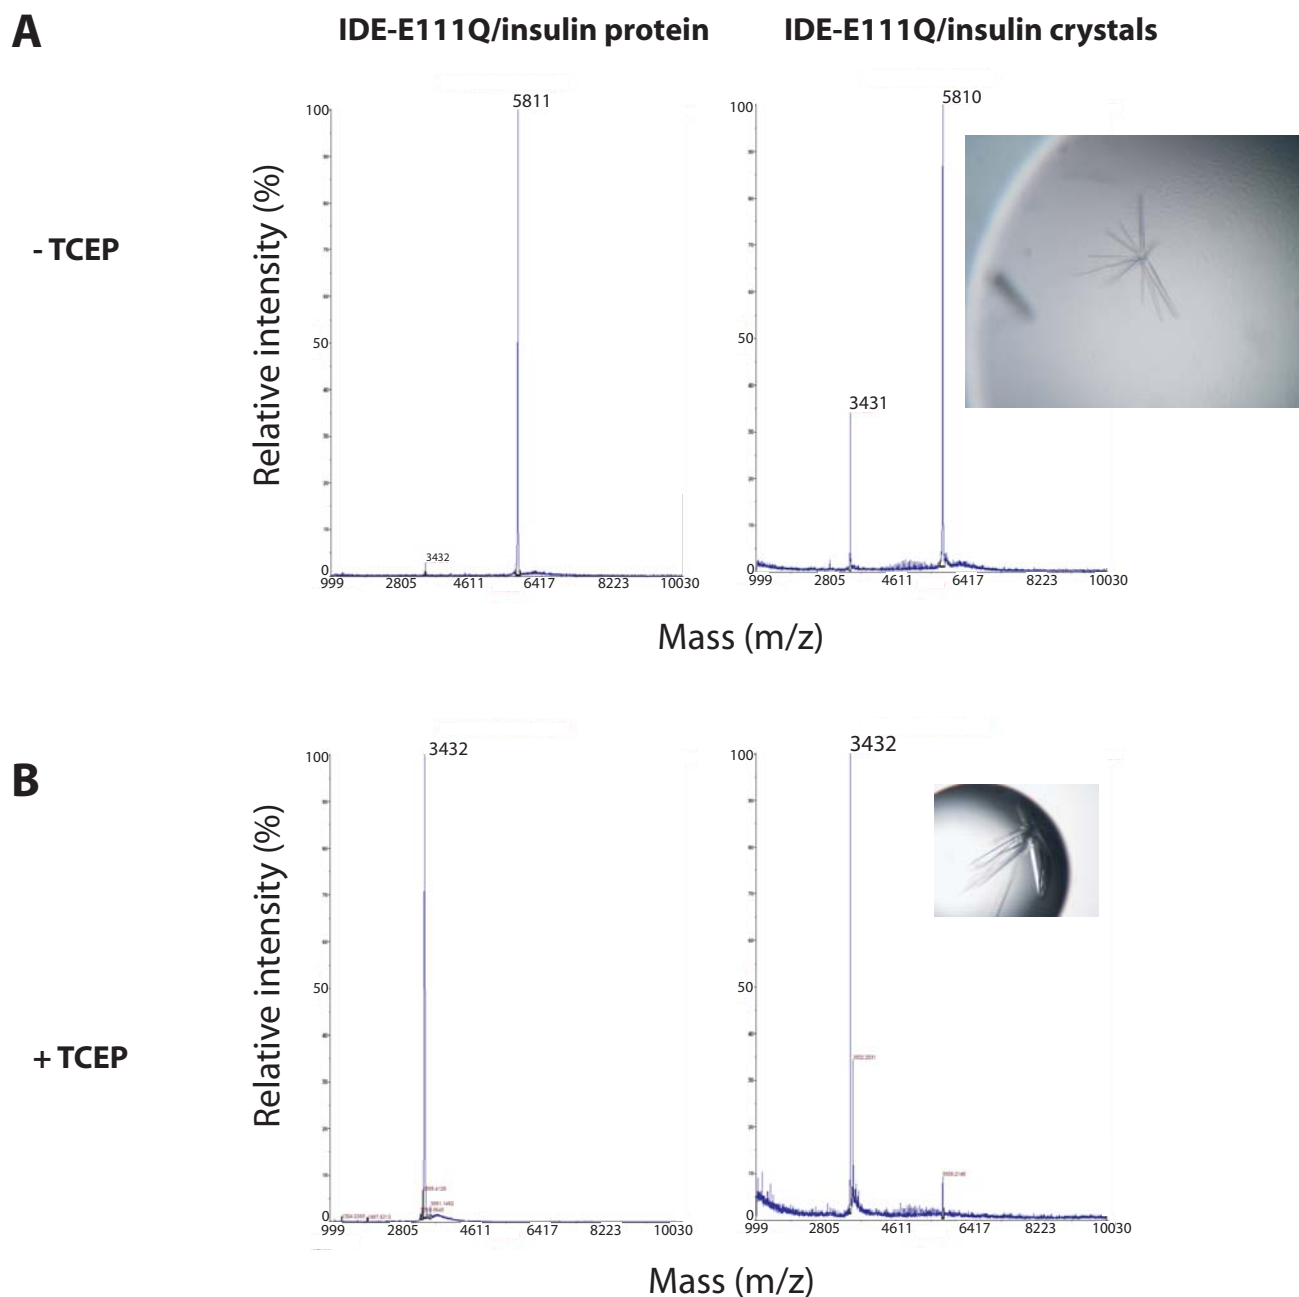

The comparison of MALDI-TOF mass spectrometry of insulin-bound IDE-E111Q complex in the absence (**A**) and presence (**B**) of TCEP. The expected molecular weight of intact insulin and insulin B chain is 5812 Da and 3431 Da, respectively. IDE-E111Q/insulin protein complex was isolated using S-200 gel-filtration chromatography (left). To know the state of insulin in the IDE-E111Q/insulin crystals, IDE-E111Q/insulin crystals were washed and dissolved by buffer (20 mM Tris, 50 mM NaCl). Crystals grown without TCEP diffract poorly. The mass spec experiment was done by the same procedure as described in supplemental figure 7.

Supplemental Table 1 Data collection and phasing statistics

|                                            |                                         |
|--------------------------------------------|-----------------------------------------|
| Crystal name                               | Se-IDE-Insulin B chain-Zn <sup>2+</sup> |
| Beamline                                   | APS, 19-ID                              |
| Space group                                | <i>P</i> 6 <sub>5</sub>                 |
| Wavelength ( Å )                           | 0.9793445                               |
| Unit cell ( Å )                            |                                         |
| <i>a</i>                                   | 263.37                                  |
| <i>c</i>                                   | 90.53                                   |
| Resolution ( Å )                           | 30-2.6                                  |
| Unique reflections                         | 110,675 (10,963)                        |
| Completeness (%)                           | 100(100)                                |
| Redundancy                                 | 22.5(20.2)                              |
| <i>R</i> <sub>sym</sub> (%)                | 9.9(64.2)                               |
| <i>I</i> / $\sigma$                        | 36.6(5.4)                               |
| Se sites                                   | 34 out of 52                            |
| Figure of merit                            | 0.506                                   |
| Figure of merit after density modification | 0.801                                   |

## Supplemental Table 2 Data collection and refinement statistics

| <b>Data collection</b>                     |                                |                               |                               |                               |                               |
|--------------------------------------------|--------------------------------|-------------------------------|-------------------------------|-------------------------------|-------------------------------|
| Crystal name                               | IDE-Insulin B-Zn <sup>2+</sup> | IDE-Insulin B                 | IDE-A $\beta$ (1-40)          | IDE-Amylin                    | IDE-Glucagon                  |
| Beamline                                   | APS, 14-BM-C                   | APS, 19-ID                    | APS, 19-ID                    | APS, 19-ID                    | APS, 19-ID                    |
| Space group                                | <i>P6<sub>5</sub></i>          | <i>P6<sub>5</sub></i>         | <i>P6<sub>5</sub></i>         | <i>P6<sub>5</sub></i>         | <i>P6<sub>5</sub></i>         |
| Unit cell (Å)                              |                                |                               |                               |                               |                               |
| <i>a</i>                                   | 262.53                         | 262.25                        | 262.43                        | 262.28                        | 262.72                        |
| <i>c</i>                                   | 90.50                          | 90.61                         | 90.71                         | 91.11                         | 90.79                         |
| Resolution (Å)                             | 50-2.25                        | 30-2.2                        | 30-2.1                        | 30-2.6                        | 30-2.5                        |
| Unique reflections                         | 166,009 (13,956) <sup>c</sup>  | 175,528 (15,806) <sup>c</sup> | 194,459 (15,723) <sup>c</sup> | 108,791 (10,738) <sup>c</sup> | 123,701 (11,802) <sup>c</sup> |
| Completeness (%)                           | 98.0 (82.9) <sup>c</sup>       | 97.2 (87.9) <sup>c</sup>      | 94.3 (76.9) <sup>c</sup>      | 99.2 (98.9) <sup>c</sup>      | 99.6 (95.6) <sup>c</sup>      |
| Redundancy <sup>a</sup>                    | 10.5 (7.1) <sup>c</sup>        | 8.4 (5.7) <sup>c</sup>        | 7.6 (4.4) <sup>c</sup>        | 5.6 (5.2) <sup>c</sup>        | 10.6 (7.5) <sup>c</sup>       |
| <i>R</i> <sub>sym</sub> (%) <sup>b</sup>   | 8.6 (63.8) <sup>c</sup>        | 6.4 (34.7) <sup>c</sup>       | 7.6 (55.0) <sup>c</sup>       | 10.4 (36.6) <sup>c</sup>      | 10.1 (49.5) <sup>c</sup>      |
| <i>I</i> / $\sigma$                        | 27.3 (2.6) <sup>c</sup>        | 26.5(4.6) <sup>c</sup>        | 24.2 (2.3) <sup>c</sup>       | 19.0 (5.2) <sup>c</sup>       | 23.6 (3.2) <sup>c</sup>       |
| <b>Refinement</b>                          |                                |                               |                               |                               |                               |
| <i>R</i> <sub>cryst</sub> (%) <sup>d</sup> | 20.6                           | 20.5                          | 20.3                          | 19.6                          | 19.8                          |
| <i>R</i> <sub>free</sub> (%) <sup>e</sup>  | 23.3                           | 22.5                          | 22.3                          | 22.5                          | 22.5                          |
| Rmsd <sub>bond</sub> (Å)                   | 0.007                          | 0.009                         | 0.008                         | 0.007                         | 0.007                         |
| Rmsd <sub>angle</sub> (°)                  | 1.3                            | 1.3                           | 1.3                           | 1.3                           | 1.3                           |
| Number of                                  |                                |                               |                               |                               |                               |
| protein atoms                              | 15,948                         | 15,914                        | 15,884                        | 16,001                        | 15,931                        |
| ligand atoms                               | 12                             | 12                            | 12                            | 12                            | 12                            |
| solvent molecules                          | 787                            | 1044                          | 1066                          | 696                           | 695                           |
| metal atoms                                | 2                              | 0                             | 0                             | 0                             | 0                             |
| Ramachandran plot (%)                      |                                |                               |                               |                               |                               |
| Favorable region                           | 90.3                           | 90.7                          | 91.3                          | 90.1                          | 89.7                          |
| Allowed region                             | 9.7                            | 9.3                           | 8.6                           | 9.8                           | 10.2                          |
| Generously allowed region                  | 0                              | 0                             | 0.1                           | 0.1                           | 0.1                           |
| Disallowed region                          | 0                              | 0                             | 0                             | 0                             | 0                             |
| B-factors (Å <sup>2</sup> )                |                                |                               |                               |                               |                               |
| IDE                                        | 36.7                           | 31.2                          | 33.5                          | 29.9                          | 33.1                          |
| Substrate                                  | 59.9                           | 41.6                          | 44.0                          | 44.5                          | 54.7                          |
| solvent                                    | 44.5                           | 40.9                          | 45.2                          | 38.4                          | 41.1                          |

<sup>a</sup> $N_{\text{obs}}/N_{\text{unique}}$ .

<sup>b</sup> $R_{\text{sym}} = \sum_{\text{hkl}} \sum_i |I_i(\text{hkl}) - \langle I(\text{hkl}) \rangle| / \sum_{\text{hkl}} \sum_i I_i(\text{hkl})$  for *n* independent reflections and *i* observations of a given reflection;  $\langle I(\text{hkl}) \rangle$  is the average intensity of the *i* observations.

<sup>c</sup>The outer resolution shell.

<sup>d</sup> $R_{\text{work}} = \sum_{\text{hkl}} |F_{\text{obs}} - F_{\text{calc}}| / \sum_{\text{hkl}} F_{\text{obs}}$ .

<sup>e</sup> $R_{\text{free}}$ , calculated the same as for  $R_{\text{work}}$  but on the 10% data excluded from the refinement calculation.
